1     **Functional variability in adhesion and flocculation of yeast**  
2                                   **megasatellite genes**

3

4

5     Cyril Saguez\*<sup>1</sup>, David Viterbo, Stéphane Descorps-Declère\*<sup>†</sup>, Brendan Cormack<sup>‡</sup>, Bernard  
6     Dujon\* and Guy-Franck Richard\*

7

8

9     \* Institut Pasteur, Université de Paris, CNRS, UMR3525, 25 rue du Dr Roux, F-75015 Paris,  
10    France

11    <sup>†</sup> Institut Pasteur, Bioinformatics and Biostatistics Hub, Department of Computational  
12    Biology, USR3756 CNRS, F-75015 Paris, France <sup>‡</sup> Department of Molecular Biology &  
13    Genetics, Johns Hopkins University, Baltimore, USA

14    <sup>1</sup> Present address: Abolis Biotechnologies, 5 Rue Henri Desbruères 91030 Evry, France

15

16

17 Running title: Evolution of tandem repeats in yeast

18

19 Keywords: *Saccharomyces cerevisiae*, *Candida glabrata*, flocculation, cellular adhesion,  
20 tandem repeat expansion

21

22 Corresponding author: Guy-Franck Richard

23 Institut Pasteur, CNRS, UMR3525, 25 rue du Dr Roux, F-  
24 75015 Paris, France

25 Tel: +33-1-40-61-34-54

26 e-Mail: [gfrichar@pasteur.fr](mailto:gfrichar@pasteur.fr)

27

28  
29  
30  
31  
32  
33  
34  
35  
36  
37  
38  
39  
40  
41  
42  
43  
44  
45  
46  
47  
48

## ABSTRACT

Megasatellites are large tandem repeats found in all fungal genomes but especially abundant in the opportunistic pathogen *Candida glabrata*. They are encoded in genes involved in cell-cell interactions, either between yeasts or between yeast and human cells. In the present work, we have been using an iterative genetic system to delete several *C. glabrata* megasatellite-containing genes and found that two of them were positively involved in adhesion to epithelial cells, whereas three genes controlled negatively adhesion. Two of the latter, *CAGLOB05061g* or *CAGLOA04851g*, are also negative regulators of yeast-to-yeast adhesion, making them central players in controlling *C. glabrata* adherence properties. Using a series of synthetic *Saccharomyces cerevisiae* strains in which the *FLO1* megasatellite was replaced by other tandem repeats of similar length but different sequences, we showed that the capacity of a strain to flocculate in liquid culture was unrelated to its capacity to adhere to epithelial cells or to invade agar. Finally, in order to understand how megasatellites were initially created and subsequently expanded, an experimental evolution system was set up, in which modified yeast strains containing different megasatellite seeds were grown in bioreactors for more than 200 generations and selected for their ability to sediment at the bottom of the culture tube. Several flocculation-positive mutants were isolated. Functionally relevant mutations included general transcription factors as well as a 230 kb segmental duplication.

49

## INTRODUCTION

50 All eukaryotic genomes sequenced so far contain a variable amount of tandemly repeat  
51 DNA sequences (Richard *et al.* 2008). These can be classified in three main categories,  
52 according to the length of their structural motif. Microsatellites are made of 1-9 bp motifs  
53 and are very abundant in all genomes. The *S. cerevisiae* genome contains 1818 di-, tri- and  
54 tetranucleotide repeats, the three most abundant microsatellites (Malpertuy *et al.* 2003),  
55 whereas the human genome contains 260,000 such repeats per haplotype (International  
56 Human Genome Sequencing Consortium 2001). Minisatellites are made of slightly larger  
57 motifs (10-90 bp) and are less frequent. Less than 100 such tandem repeats were found  
58 in the budding yeast genome, mainly in genes encoding cell wall proteins (Bowen *et al.*  
59 2005; Verstrepen *et al.* 2005; Richard and Dujon 2006). Finally, an additional family was  
60 proposed to encompass tandem repeats whose structural motif was larger, those were  
61 called megasatellites (Thierry *et al.* 2008, 2009). Initially described in the pathogenic  
62 yeast *Candida glabrata* as tandem repeats whose base motif was larger than 100 bp, this  
63 was refined by a subsequent study covering 21 fungal genomes, in which it was found that  
64 length distribution of minisatellites and megasatellites were different. It was therefore  
65 chosen to use a length cutoff between the two kinds of tandem repeats of 90 bp, with those  
66 whose structural motif was larger being called megasatellites (Figure 1A) (Tekaiia *et al.*  
67 2013).

68 *Candida glabrata* contains 44 megasatellites, in 33 different genes (Thierry *et al.* 2008).  
69 Most of the protein functions encoded by these genes are unknown, but many carry  
70 signatures of cell wall proteins and are good candidates to be involved in yeast adhesion  
71 to epithelial cells. The structure of megasatellite-containing genes is always the same: the  
72 tandem repeat is located in the middle of the gene, 1-2 kb after the start codon and 300-  
73 2500 bp from the stop codon, always in frame (Figure 1B). Several families of motifs were

74 found to be encoded by megasatellites, but two were particularly frequent and were  
75 called SHITT and SFFIT motifs, based on the eponymous five amino acids conserved in the  
76 translation products of all motifs of the family (Figure 1C). The duplication and evolution  
77 of these motifs was studied by clustering analyses and showed recurrent transfer of  
78 genetic information between megasatellites (Rolland *et al.* 2010). Recent resequencing of  
79 *C. glabrata*, using a mix of long and short reads, allowed to make substantial corrections  
80 to the reference genome. Forty-five genes that were misassembled were removed or  
81 fixed, 31 new open reading frames were annotated and 21 repeat-containing genes were  
82 corrected, establishing a new high quality reference for the *C. glabrata* genome (Xu *et al.*).  
83 By chromosomal conformation capture, there was no evidence that megasatellites cluster  
84 within the *C. glabrata* nucleus, nor that they were frequently associated with replication  
85 origins or terminations (Descorps-Declère *et al.* 2015). *S. cerevisiae* also contains several  
86 megasatellites, although fewer than its pathogenic cousin. The best known gene family  
87 containing megasatellites is the FLO family, in which the *FLO1*, *FLO5* and *FLO9* genes  
88 encode a 135 bp FLO motif, rich in threonine residues (Richard and Dujon 2006; Rolland  
89 *et al.* 2010). *FLO1* has been identified for a long time as being one of the genes responsible  
90 for budding yeast flocculation in liquid culture and the length of the FLO megasatellite  
91 was shown to be positively correlated to the extent of flocculation (Verstrepen *et al.*  
92 2005). Other yeast species also contain megasatellites, the most widespread motif being  
93 related to the FLO motif (Tekaija *et al.* 2013). *Candida albicans* and *Candida dubliniensis*  
94 genomes contain several ALS megasatellites encoded by the eponymous adhesin gene  
95 family, involved in yeast adhesion to epithelial cells (Hoyer 2001). Interestingly, very  
96 recent work showed that megasatellite length in two *S. cerevisiae* genes (*HPF1* and *FLO11*)  
97 is correlated with life span, as determined by QTL analyses. Repeat expansion in the *HPF1*  
98 gene shifted yeast cells from a sedimenting to a buoyant state, completely modifying

99 oxygenation as well as the surrounding metabolism, resulting in shorter life span (Barre  
100 *et al.* 2019).

101 The aim of the present work was to decipher the function of megasatellite-containing  
102 genes in *Candida glabrata*, as well as setting up an experimental evolution assay, using  
103 *FLO1*-dependent flocculation, to catch primary events leading to megasatellite formation  
104 in *Saccharomyces cerevisiae*. By iteratively deleting *C. glabrata* subtelomeric  
105 megasatellites, we found that some deletions increased cellular adhesion whereas others  
106 decreased it, suggesting a complex role for megasatellite-containing genes. The  
107 experimental evolution assay allowed the isolation of flocculation mutants, but none of  
108 them showed an amplification of the *FLO1* megasatellite. Using synthetic *FLO1* genes, we  
109 found that different tandem repeats play distinct roles in flocculation and cell-to-cell  
110 adhesion.

111

## 112 MATERIALS AND METHODS

### 113 *C. glabrata* plasmids

114 A 578 bp piece of *Yarrowia lipolytica* genome located in an intergenic region (Chrom. A,  
115 2057200-2057778) was PCR amplified using primers YALupfor and YALuprev  
116 (Supplemental Table 1, top). The PCR product was digested with *KpnI* and *BamHI* and  
117 cloned in pBlueScript SK+ at the corresponding sites. The resulting plasmid (pMEG0) was  
118 digested with *BglIII* and *BamHI* and ligated to the *C. glabrata URA3* gene amplified using  
119 CgURA3 primers and digested with the same restriction enzymes, to give plasmid pMEG1.  
120 The same 578 bp piece of *Y. lipolytica* genome was amplified with YALdownfor and  
121 YALdownrev primers, digested with *BglIII* and *NotI* and cloned into pMEG1 at the  
122 corresponding restriction sites. The resulting plasmid (pMEG2) was subsequently  
123 digested with *NotI*, dephosphorylated and ligated to phosphorylated TELup and TELdown

124 complementary oligonucleotides, encoding four *C. glabrata* telomeric repeats (Kachouri-  
125 Lafond *et al.* 2009), to give plasmid pMEG3. All subsequent constructs used to delete  
126 telomeric megasatellites were made in pMEG3. For each deletion, ca. 1000 bp upstream  
127 to the megasatellite were amplified using dedicated primers (Supplemental Table 1,  
128 bottom). PCR products were digested by *KpnI* and cloned into pMEG3 at the *KpnI* site, to  
129 give plasmids pMEG4 to pMEG18. Note that some PCR products could not be cloned,  
130 therefore initially planned deletions of genes *CAGLOE00231g* and *CAGLOC00253g*, were  
131 not achieved (Figure 1C, genes in grey).

132

### 133 ***S. cerevisiae* plasmids**

134 Synthetic FLO genes were assembled in the pRS406 integrative plasmid, carrying *URA3*  
135 as a selection marker (Sikorski and Hieter 1989). pRS406-*FLO1*ΔR was built as follows:  
136 primers SC1 and SC6 were used to amplify a 1272 bp DNA fragment from the *FLO1* gene  
137 upstream the megasatellite and overlapping pRS406; primers SC4 and SC5 were used to  
138 amplify a 1776 bp DNA fragment from the *FLO1* gene downstream the megasatellite and  
139 overlapping pRS406 (Supplemental Table 2). Both PCR products were assembled into  
140 pRS406 using Gibson assembly mix (NEBiolabs). Plasmid pRS406-*FLO1*ΔR::*FLO* was built  
141 as follows: primers SC1 and SC2 were used to amplify a 1252 bp DNA fragment from the  
142 *FLO1* gene upstream the megasatellite and overlapping pRS406; primers SC3 and SC4  
143 mlwere used to amplify a 1753 bp DNA fragment from the *FLO1* gene downstream the  
144 megasatellite and overlapping pRS406. Both PCR products were assembled into pRS406  
145 along with primers SC7, SC8, SC9 and SC10 using Gibson assembly. This reconstituted a  
146 *FLO1* gene containing only one FLO motif. Plasmid pRS406-*FLO1*ΔR::*SHITT* was built the  
147 same way, except that primers SC11, SC12, SC13 and SC14 were used in the Gibson  
148 assembly to reconstitute a *FLO1* gene containing only one SHITT motif. Plasmid pRS406-

149 *FLO1*ΔR::ALS was built the same way, except that primers SC15, SC16, SC17 and SC18  
150 were used in the Gibson assembly to reconstitute a *FLO1* gene containing only one ALS  
151 motif. Plasmid pRS406-*FLO1*ΔR::2FLO was built as follows: primers SC8, SC9, SC10 and  
152 SC19 were phosphorylated and ligated *in vitro* using T4 DNA ligase to make a 178 bp piece  
153 of DNA containing one FLO motif. primers SC7, SC8, SC9 and SC20 were phosphorylated  
154 and ligated to make a 175 bp piece of DNA also containing one FLO motif. Both FLO motifs  
155 were ligated and gel purified to make a 353 bp piece of DNA containing two FLO motifs.  
156 This DNA was assembled into pRS406 along with SC1-SC2 and SC3-SC4 PCR products  
157 using Gibson assembly. This reconstituted a *FLO1* gene containing a tandem of two FLO  
158 motifs.  
159 The *FLO1* genes containing synthetic tandem repeats were designed and assembled at  
160 ProteoGenix. They were delivered as identical copies of *FLO1* containing 10 tandemly  
161 repeated FLO motifs, 10 FLOamy motifs, 10 SHITT motifs or 13 ALS motifs, inserted at the  
162 normal location within the gene. Synthetic *FLO1* genes were delivered cloned in pUC57  
163 and were transferred in pRS406 for further integration in yeast cells.

164

### 165 ***Candida glabrata* strains**

166 All megasatellite deletions were made in the HM100 strain, a derivative of the reference  
167 CBS138 strain, or in the BG14 strain, a derivative of the commonly used BG2 strain. Both  
168 HM100 and BG14 strains were inactivated for the *URA3* gene. Each pMEG plasmid was  
169 digested with *SacII* in order to release the recombinogenic DNA fragment (Figure 1D) and  
170 transformed in *C. glabrata* following the lithium acetate protocol used for *S. cerevisiae*  
171 (Gietz *et al.* 1995). Transformants were subcloned on synthetic SC-Ura dropout medium  
172 before DNA extraction and molecular analysis. For each deletion, eight transformants  
173 were analyzed by Southern blot according to published methods (Viterbo *et al.* 2018).



174 Transformants showing the expected pattern of bands were patched on yeast complete  
175 medium (YPD) and grown for 2-3 days at 30°C, before being replica plated on a 5-FOA  
176 plate supplemented with 15-20 mM nicotinamide, in order to unsilence subtelomeric  
177 regions. Without nicotinamide the whole patch was growing due to silencing of the *URA3*  
178 gene and we were unable to select [Ura-] clones. One or two [Ura-] colonies were  
179 subcloned on 5-FOA plate supplemented with nicotinamide, before PFGE analysis. All  
180 strains are described in Supplemental Table 3.

181

### 182 ***S. cerevisiae* strains**

183 Total gene deletions of *FLO9* and *FLO11* were carried out by classical "ends out"  
184 recombination (Baudin *et al.* 1993). *FLO8* correction, *FLO5* and *FLO10* megasatellite  
185 deletions, as well as all modifications of the *FLO1* gene were performed by the classical  
186 two-step replacement method (Sherer and Davis 1979). Note that only the repeated part  
187 of *FLO5* and *FLO8* were deleted, the remaining portions of the gene, 5' and 3' of the  
188 megasatellite, were kept in frame. This is the meaning of "ΔR" alleles indicated in  
189 Supplemental Table 3. Transformants were analyzed by Southern blot to verify all  
190 constructs.

191

### 192 **Pulse-field gel electrophoresis of *C. glabrata* mutants**

193 All [Ura-] mutants were analyzed by PFGE in order to check that the expected  
194 chromosome had been targeted. Yeast cells were grown to stationary phase in YPD,  
195 overnight at 30°C. In the morning, ca. 5 x 10<sup>8</sup> cells were collected, centrifuged and washed  
196 with 5 mL 50 mM EDTA (pH 9.0). The pellet was resuspended in 330 μL 50 mM EDTA (pH  
197 9.0), taking into account the pellet volume. Under a chemical hood, 110 μL of Solution I (1  
198 M sorbitol, 10 mM EDTA (pH 9.0), 100 mM sodium citrate (pH 5.8), 2.5% β-

199 mercaptoethanol and 10  $\mu$ L of 100 mg/mL Zymolyase 100T-Seikagaku) were added to  
200 the cells, before 560 mL of 1% InCert agarose (Lonza) were delicately added and mixed.  
201 This mix was rapidly poured into plug molds and left in the cold room for at least 10  
202 minutes. When solidified, agarose plugs were removed from the molds and incubated  
203 overnight at 37°C in Solution II (450 mM EDTA (pH 9.0), 10 mM Tris-HCl (pH 8.0), 7.5%  
204  $\beta$ -mercaptoethanol). In the morning, tubes were cooled down on ice before Solution II  
205 was delicately removed with a pipette and replaced by Solution III (450 mM EDTA (pH  
206 9.0), 10 mM Tris-HCl (pH 8.0), 1% N-lauryl sarcosyl, 1 mg/mL Proteinase K). Tubes were  
207 incubated overnight at 65°C, before being cooled down on ice in the morning. Solution III  
208 was removed and replaced by 500 mM EDTA (pH 9.0) before being loaded on gel. A 1%  
209 SeaKem agarose gel (Lonza) was poured in 0.25 X TBE buffer, plugs were loaded and the  
210 run was performed on a Rotaphor machine (Biometra) in 0.25 X TBE. Parameters chosen  
211 for *C. glabrata* chromosomes were set on: initial pulse: 200 seconds, final pulse: 70  
212 seconds, run time: 70 hours, voltage: 140 V, angle: 120° (linear), temperature: 12°C. At  
213 the end of the run, the gel was stained in ethidium bromide, before being transferred for  
214 hybridization, as previously described (Viterbo *et al.* 2018).

215

## 216 **Evolution to flocculation experiment settings**

217 Cells were grown in 55 mL bioreactors, in rich medium (YPD) at 30°C under constant  
218 oxygenation. The oxygen inlet reached the bottom of the tube, therefore flocculating cells  
219 would obtain a slight growth advantage over buoyant cells. Preliminary tests showed that  
220 flocculating yeasts were more frequent when cells were grown to stationary phase rather  
221 than when continuously grown in exponential phase. Stationary phase was reached  
222 around OD 25 ( $1.8 \times 10^8$  cells/mL). After one week, 50 mL of culture was removed from  
223 the top of the bioreactor. The bottom 5 mL was homogenized and diluted to OD ~0.1 (7 x

224  $10^5$  cells/mL), in fresh YPD, after which cells started to grow exponentially until reaching  
225 stationary phase (Supplemental Figure 1). This was performed 27 times in a row over a  
226 period of six months, resulting in a total of 214-218 generations for each strain. When the  
227 whole culture was entirely flocculating, it was isolated and analyzed. A fresh culture was  
228 restarted from the frozen stock (generation 0). The [Flo+] phenotype was confirmed by a  
229 larger culture in flask allowing to assess the presence of large flocs each containing  
230 millions of yeast cells. Calcium-dependence flocculation phenotype was first verified by  
231 adding EDTA to the liquid culture, before precise identification of the mutation by  
232 molecular means. Each mutant was subsequently tested for dominance/recessivity and  
233 complementation tests with known flocculation mutants (or whole genome sequencing if  
234 complementation proved to be negative), as well as invasion tests on agar plates.

235

### 236 **Adhesion on epithelial cells**

237 Lec2 cells were grown to confluence in 24-well microplates, fixed with 2%  
238 paraformaldehyde for 2 hours, washed four times with PBS and stored at 4°C in PBS +  
239 Pen/Strep. Yeast cells were grown in YPD to stationary phase, diluted 1/20° in YPD  
240 supplemented with 20 mM nicotinamide in order to unsilence subtelomeric regions (De  
241 Las Penas *et al.* 2003), and grown for another 3 hours at 30°C. Cultures were washed three  
242 times in 1X HBSS supplemented with 5 mM CaCl<sub>2</sub>. Cell concentration was determined and  
243 adjusted to  $10^7$  cells/mL. Three dilutions of this inoculum were plated on YPD to serve as  
244 the input. Three wells of the same Lec2 cells fixed in 24-well microplate were incubated  
245 with 1 mL of the inoculum and incubated 5 minutes at room temperature. The microplate  
246 was spined down at 100 rpm for one minute, then incubated at room temperature for 10  
247 minutes. The microplate was inverted to remove inocula and each well was washed four  
248 times with 500  $\mu$ L HBSS supplemented with 5 mM CaCl<sub>2</sub>. Finally, 500  $\mu$ L of cell lysis buffer

249 (1X PBS, 10 mM EDTA (pH 8.0), 0.05% Triton X100) was added to each well, cells were  
250 scraped thoroughly, diluted to an appropriate concentration and plated on YPD to serve  
251 as the output. Adhesion was calculated as the ratio of output CFU/input CFU. Note that  
252 given the experimental variability from plate to plate, an appropriate wild-type control  
253 (CBS138 or BG2) was added in triplicate in each plate.

254

### 255 **Invasion of agar plates**

256 Yeast cells were grown to stationary phase in YPD, then patched on YPD and grown for 6-  
257 10 days at 30°C. Plates were gently washed under running water until the cell layer was  
258 removed and plates were incubated an extra 24 hours at 30°C. Adhesion was visually  
259 evaluated according to the amount of growth visible after 24 hours and classified in three  
260 categories: no adhesion, weak adhesion, strong adhesion.

261

### 262 **Flocculation tests**

263 Yeast cells were grown to stationary phase in YPD. Culture tubes were vortexed and left  
264 one minute to stand on the bench before 200  $\mu$ L were collected right below the meniscus.  
265 Optical density at 600 nm of collected cells was determined and used as a proxy for  
266 flocculation capacity.

267

### 268 **Spheroplast rate assay**

269 For each of the two yeast species, a lysis curve was first established with wild-type strains  
270 (BY4741 and HM100), as previously published (Ovalle *et al.* 1998). Cells were grown  
271 overnight to stationary phase in YPD and diluted 1/50<sup>o</sup> in the morning in 50 mL fresh  
272 medium. When cell concentration reached  $10^7$ - $3 \times 10^7$  cells/mL,  $3 \times 10^8$  cells were  
273 collected and washed thrice with sterile water in a 50mL polypropylene tube. Cells were

274 resuspended in 15 mL 10 mM Tris buffer pH 8.0, 10 mM EDTA pH 8.0, to disrupt potential  
275 flocculation aggregates. Zymolyase (100T, Seikagaku) was added at a final concentration  
276 of 3.3 µg/mL. The tube was incubated at 25°C and 1 mL of cell suspension ( $2 \times 10^7$  cells )  
277 was collected every 5 minutes during 75 minutes. Cells were diluted  $1/10^\circ$  in water and  
278 optical density at 600 nm was determined. OD were plotted at each time point to identify  
279 the linear part of the lysis curve (Ovalle *et al.* 1998). This allowed to determine that in  
280 subsequent experiments with *S. cerevisiae* and *C. glabrata* mutants, OD measurements  
281 should be performed after 10 minutes of incubation with zymolyase.

282 For each mutant and wild type controls, yeast cells were grown overnight to stationary  
283 phase, in 3 mL YPD at 30°C. In the morning,  $1/50^\circ$  dilutions were performed in 3 mL fresh  
284 YPD. When cell concentration reached  $10^7$ - $3 \times 10^7$  cells/mL,  $2 \times 10^7$  cells were collected,  
285 washed thrice with sterile water in a microtube, and resuspended in 1 mL 10 mM Tris  
286 buffer pH 8.0, 10 mM EDTA pH 8.0. Zymolyase was added at a final concentration of 3.3  
287 µg/mL and tubes were incubated at 25°C for 10 minutes, before being transferred on ice  
288 to stop the reaction. After pipetting several times to homogenize, 100 µL cells were  
289 collected, 900 µL water were added and OD at 600 nM was determined for each sample  
290 tube. All experiments were performed 3 times for each strain.

291

292 All statistical analyses were performed using the 'R' package (Millot 2011).

293

294 All reagents, plasmids and yeast strains described in the present manuscript are freely  
295 available on request.

296

297

## RESULTS

298 **Megasatellite-containing genes play different roles in *C. glabrata* cellular adhesion**

299 In a first series of experiments, we intended to delete all telomeric megasatellites, using a  
300 reusable marker strategy and a telomeric seed sequence (Sandell and Zakian 1993). The  
301 upstream sequence of each gene was PCR amplified and cloned in a plasmid (pMEG3,  
302 Figure 1D) containing the *C. glabrata URA3* gene flanked by a 600 bp tandem repeat  
303 sequence from *Yarrowia lipolytica* (*TR*, Figure 1D). After linearization, each plasmid was  
304 transformed into *C. glabrata* and [Ura+] transformants were recovered. All of them were  
305 analyzed by Southern blot, in order to verify that the integration site was correct. Each  
306 *bona fide* deletant was then plated on 5-FOA medium in order to select [Ura-] subclones  
307 in which the *URA3* marker had been lost by recombination between the two *TR* sequences.  
308 Following this procedure, resulting strains could then be reused to delete a second  
309 telomeric megasatellite. Up to eleven megasatellites were iteratively deleted in the same  
310 strain using this approach.

311 All clones were analyzed by Southern blot, using either the *URA3* gene or the *TR* repeat as  
312 a probe. Hybridization with the *URA3* probe revealed a band whose molecular weight was  
313 2830 bp plus the length of the added telomeric repeat. We found that such signals could  
314 reach more than 10 kb, depending on the transformant (Figure 2A, top). However, after  
315 5-FOA selection, telomere length decreased to a more reasonable 200-600 bp (Figure 2A,  
316 bottom). It is possible that tandem integration of the *TR-URA3-TR* cassette produced long  
317 telomeric fragments, that were lost by recombination after 5-FOA selection. Strain  
318 karyotype was also analyzed by pulse-field gel electrophoresis (PFGE), in order to  
319 separate all yeast chromosomes. The gel was thereafter transferred and hybridized using  
320 the *TR* repeat as a probe. Chromosomes carrying at least one such repeat were revealed  
321 (Figure 2B, top). In most cases, the PFGE profile perfectly matched the expected profile  
322 according to the published sequence (Figure 2B, bottom). This shows that the  
323 megasatellite genes we attempted to delete were properly assembled on their cognate

324 chromosomes in the genome sequence (Dujon *et al.* 2004). In one instance, the targeting  
325 construct for gene *CAGL0L00157g* integrated on chromosome G instead of L. This strain  
326 was not used in subsequent experiments (CGF251 in Supplemental Table 1). All these  
327 mutants were engineered in the CBS138 type strain. When we tried to build equivalent  
328 mutations in the BG2 strain background -commonly used for adhesion studies (Cormack  
329 *et al.* 1999)- fewer transformants were obtained and most of them were not integrated at  
330 the expected locus. This is probably due to sequence polymorphisms between the two  
331 strains as well as to chromosomal translocations such as those previously described  
332 (Muller *et al.* 2009). Only one mutant could finally be built in the BG2 background (strain  
333 CGF21).

334 We ended up generating seven single mutants and 13 multiple mutants, carrying from  
335 one to eleven subtelomeric deletions (Supplemental Table 1). All these strains were  
336 tested for their capacity to adhere to hamster epithelial cells (Lec2). (Figure 3). In each  
337 experiment, a wild-type strain (either CBS138 or BG2) served as an internal standard and  
338 the adhesion of each mutant strain was divided by the adhesion value in the standard.  
339 When this ratio was above one, the mutant was considered to adhere better than the wild  
340 type, the opposite when the ratio was lower than one. Strains deleted for *EPA1*, *EPA2*,  
341 *EPA3*, *EPA6* and *EPA7*, known adhesins in *C. glabrata*, were used as controls.

342 In the BG2 background, as expected, the *epa1* $\Delta$  mutant as well as the *epa1* $\Delta$  *epa6* $\Delta$  *epa7* $\Delta$   
343 triple mutant were less adherent than wild type (Figure 3B). No effect was found for the  
344 deletion of *CAGL0B05061g*.

345 In the CBS138 background, *EPA1* (and downstream *EPA2* and *EPA3*) deletion led to  
346 reduced adhesion (Mann-Whitney test p-value= 4.1%), although markedly less than  
347 compared to the BG2 background. We concluded that *EPA1* played a more central role in  
348 adhesion in the BG2 background than in CBS138 under the conditions of this assay. Three

349 single deletions showed a small but significant increase in adhesion: *CAGLOB05061g*  
350 (which had no effect in BG2), *CAGL0K13024g* and *CAGLOA04851g*. *CAGLOB05061g* and  
351 *CAGL0K13024g* contain pure SHITT repeats whereas *CAGLOA04851g* contains one of the  
352 longest megasatellite of the yeast genome with 113 SHITT and four SFFIT repeats (Figure  
353 1C).

354 We originally expected that multiple deletions showed an additive effect on adhesion, but  
355 results were more intricate. A summary of the order in which multiple deletions were  
356 performed is shown in Figure 3C. Deleting *CAGLOI00209g* in CGF61 strain decreased  
357 adhesion, as did further deletion of *CAGL0L00157g* deletion, whereas deleting  
358 *CAGLOE00165g* did not reduce it. These three genes all contain a SFFIT repeat (Figure 1C),  
359 but in as much as deleting multiple genes did not give a simply cumulative effect on  
360 adhesion, our data do not suggest that they are functionally redundant. The next set of  
361 multiple mutations showed that deleting *CAGL0K13024g* in addition to *CAGLOB05061g*  
362 did not modify the strain ability to adhere to epithelial cells. Deletion of *CAGLOH00209g*  
363 and *CAGLOG10219g* somewhat decreased adhesion whereas deleting *CAGLOF00099g*  
364 significantly increased values above wild type in this quintuple mutant. Adding successive  
365 deletions of five more megasatellites tended to increase experimental variability, but  
366 none of these multiple mutants was statistically different from wild type. We conclude  
367 from these experiments that *CAGLOB05061g*, *CAGL0K13024g*, *CAGLOA04851g* and  
368 *CAGLOF00099g* can (at least in certain strain contexts) play a negative role in adhesion  
369 (their deletion increases adhesion) whereas *CAGLOI00209g* and *CAGL0L00157g* can play  
370 a positive role (their deletion decreases adhesion), no other gene could be shown to play  
371 any significant function. More importantly, we found no evidence that a capacity in  
372 increasing or decreasing adhesion could be specifically attributed to SFFIT or SHITT  
373 repeat-containing genes.



374 We subsequently performed two other assays on the same mutants: a flocculation assay  
375 to determine whether cell-to-cell adhesion between yeasts was modified and a  
376 spheroplast rate assay to determine cell wall integrity (Ovalle *et al.* 1998). The individual  
377 deletion of *CAGLOB05061g*, *CAGLOF00099g*, *CAGLOA04851g* or *CAGLOE00165g*  
378 significantly increased the ability of these mutants to flocculate (Figure 4A). When  
379 multiple deletions were examined, it was found that all strains deriving from CGF11  
380 (deleted for *CAGLOB05061g*) also showed increased flocculation. The first conclusion that  
381 could be drawn by comparing Figures 3B and 4A is that deletion of *CAGLOB05061g* or  
382 *CAGLOA04851g* increases both adhesion to epithelial cells and between yeast cells. No  
383 other obvious correlation could be observed, showing that these two phenotypes mainly  
384 involve different genes. The second conclusion is that flocculation in multiple deletants is  
385 consistent with additional mutations not altering the phenotype. CGF121, CGF151 and  
386 CGF181 are not statistically different from each other and from the HM100 wild type  
387 reference, and the series of multiple mutations deriving from CGF51 are all significantly  
388 different from wild type (Figure 4A).

389 A spheroplast rate assay was performed in order to determine whether some mutations  
390 could significantly affect cell wall integrity. Optical densities at 600 nm was measured  
391 after incubation with a solution of zymolyase (Materials & Methods), OD reduction  
392 reflecting decrease in cell wall integrity (Ovalle *et al.* 1998). Overall, no significant  
393 difference was observed between any of the single or multiple mutants and the wild type  
394 control strain, or among the different mutants (Figure 4B). We concluded that none of the  
395 deleted genes was essential for cell wall integrity in *C. glabrata*.

396

397 **Megasatellite evolution of *S. cerevisiae* populations grown in bioreactor**

398 In a second series of experiments, we decided to use *S. cerevisiae* as a test tube to address  
399 the intriguing question of megasatellite formation and expansion. Budding yeast encodes  
400 five genes involved in flocculation and cellular adhesion. *FLO1*, *FLO5* and *FLO9* are  
401 paralogues, each containing a 135 bp threonine-rich megasatellite (Richard and Dujon  
402 2006). *FLO1* is the main gene responsible for flocculation and its efficacy is correlated to  
403 the megasatellite length (Verstrepen *et al.* 2005). *FLO10* encodes an 81 bp serine-rich  
404 minisatellite, whose sequence is unrelated to *FLO1/5/9*. *FLO11* encodes a highly repeated  
405 serine-rich 30 bp minisatellite, whose sequence is also unrelated to *FLO1/5/9* but directly  
406 responsible for cellular adhesion of yeast cells with each other in specific conditions  
407 (Fidalgo *et al.* 2006). We wanted to delete all FLO megasatellites, in order to follow  
408 evolution of the sole *FLO1* gene in a bioreactor, over hundreds of generations. To that end,  
409 we engineered a wild type BY4741 strain as follows. First, we replaced the non-functional  
410 allele (*flo8-1*) in BY4741, with wild-type *FLO8*, which encodes *FLO1* transcriptional  
411 activator, in order to restore the strain capacity to flocculate (Liu *et al.* 1996). Next, *FLO9*  
412 and *FLO11* were deleted and the megasatellites encoded in *FLO5* and *FLO10* coding  
413 regions were perfectly deleted, leaving the remaining parts of both genes intact and in  
414 frame. The resulting strain (CSY2, Supplemental Table 3) flocculates very well in the  
415 presence of Ca<sup>2+</sup>. From this strain, a series of mutants were built, in which the *FLO1*  
416 megasatellite was replaced by one SHITT motif from *C. glabrata*, one ALS motif from  
417 *C. albicans*, one or two FLO motifs from *S. cerevisiae* or no motif at all (Figure 5A). These  
418 megasatellite motifs were chosen because they exhibit similar lengths (135 bp for FLO  
419 and SHITT, 108 bp for ALS), and because the FLO motif is the most widely spread in fungal  
420 genomes (Tekaiia *et al.* 2013). None of these engineered strains was able to flocculate  
421 efficiently, proving that *FLO1* function depends on the FLO megasatellite for flocculation.  
422 These five strains, as well as a wild type BY4741 control and its *flo1*Δ derivative, were

423 incubated in a bioreactor under constant oxygenation, in such a way that the air vent  
424 reached the bottom of the culture tube, in order to give a slight selective advantage to  
425 sedimenting cells (Figure 5B). Cultures were grown in parallel until flocculation was  
426 clearly visible as a drop in OD600 absorbance at the top of the tube, indicating that cell  
427 clumps were sedimenting to the bottom (Supplemental Figure 1). When a [Flo+] revertant  
428 appeared in one of the cultures, it was isolated and identified either by functional  
429 complementation with wild-type versions of genes known to inhibit flocculation, or by  
430 whole-genome sequencing if complementation did not suppress flocculation.

431 Three independent flocculation mutants were found in the BY4741 strain, after 48, 56 or  
432 70 generations (Table 1): a point mutation in the *SSN6* gene, a general transcriptional  
433 corepressor (Chen *et al.* 2013), a short deletion in the *ACE2* gene, a transcription factor  
434 whose disruption prevents mother-daughter cell separation, generating multicellular  
435 yeast aggregates (Oud *et al.* 2013 p. 2; Ratcliff *et al.* 2015), and a point mutation in the  
436 *SRB8* gene, encoding a subunit of the RNA polymerase II mediator complex, involved in  
437 general transcriptional regulation, interacting with the Ssn6p-Tup1 complex (Núñez *et al.*  
438 2007). This proved that our experimental setting was properly working to select  
439 flocculation proficient revertants. All strains were grown in parallel and an unexpected  
440 [Flo+] revertant was identified in the *flo1*Δ strain, after 70 generations. It turned out to be  
441 a point mutation in the *TUP1* gene, the *SSN6* partner in transcriptional repression.

442 Another mutant arose in the *FLO1::SHIT*T strain, after 218 generations. Whole-genome  
443 sequencing identified a 230 kilobases segmental duplication on chromosome II, extending  
444 from a Ty2 (*YBL100c*) to a Ty1 retrotransposon (*YBR013c*). Segmental duplications  
445 occurring between transposons or LTRs are frequent in *S. cerevisiae* (Kozul *et al.* 2004)  
446 and involve break-induced replication (Payen *et al.* 2008) but this one surprisingly  
447 covered the centromeric region, suggesting that the duplication was episomal, as was

448 sometimes observed in evolution experiments with *S. cerevisiae* (Thierry *et al.* 2015). We  
449 did not investigate further this duplication. No other flocculation revertant could be  
450 identified in any of the other strains after more than 200 generations (Table 1), not even  
451 in the strain containing a tandem repeat of two FLO motifs in which we naively expected  
452 to detect an amplification by classical replication or recombination slippage (Richard and  
453 Pâques 2000). This result led us to the conclusion that generating a megasatellite by local  
454 duplication of a motif must be an extremely rare event, or that it occurred by a totally  
455 different mechanism than the one initially imagined, or only under particular  
456 environmental conditions.

457

#### 458 **Functional variability of synthetic megasatellites in *S. cerevisiae***

459 In a third series of experiments, we determined whether a specific function could be  
460 attributed to a given megasatellite, or if any tandem repeat could be substituted while  
461 retaining the same general gene function. To that end, the *FLO1* gene was engineered to  
462 encode different synthetic megasatellites: 10 FLO repeats (hereafter called synFLO), 10  
463 FLO repeats modified to encode amyloid-forming peptide motifs (synFLOamy) (Ramsook  
464 *et al.* 2010), 10 SHITT repeats (synSHITT) or 13 ALS repeats (synALS) (Supplemental  
465 Table 4). The *FLO1* gene was replaced in the CSY5 strain by each one of these four  
466 synthetic constructs in four different strains (Figure 5C). All these synthetic repeat  
467 strains, as well as the other strains used for evolution experiments were tested for four  
468 different phenotypes: adhesion to epithelial Lec2 cells, flocculation, invasion of agar  
469 plates and cell wall integrity (Figure 6).

470 Results obtained for flocculation showed that none of the *FLO1* gene with only one motif  
471 (FLO, ALS, SHITT) or two motifs (2FLO) flocculated better than a strain in which all *FLO1*  
472 repeats were deleted (*FLO1* $\Delta$ R strain, Figure 6A). [Flo+] revertants that were isolated

473 during the previous evolution experiment (strains CSY20 to 24) flocculated well, although  
474 at variable levels and always less than *FLO8 FLO1* cells (CSY1 or CSY2). Interestingly,  
475 synthetic repeat strains displayed different flocculation degrees; synFLO, synSHITT and  
476 synFLOamy were statistically different from wild type, but synALS did not flocculate,  
477 proving that although its total length was similar to the three others this megasatellite is  
478 not sufficient to trigger flocculation. Therefore, this phenotype was dependent on the  
479 particular sequence of the megasatellite used rather than on a fixed distance between N-  
480 and C-terminus of the encoded protein.

481 Next, we investigated the adhesion to epithelial cells of the different engineered *FLO1*  
482 mutants. As expected, *C. glabrata* (HM100) was more adherent than any of the  
483 *S. cerevisiae* strains (Figure 6B). None of the FLO, SHITT or ALS strains increased  
484 adherence over background. The synFLOamy construct, but not the synFLO construct,  
485 exhibited a significant decrease in adhesion, as compared to wild type, showing that in  
486 the context of *FLO1*, the corresponding megasatellite partially inhibited adhesion to  
487 epithelial cells. It is possible that facilitating yeast-yeast interactions by making amyloid  
488 fibers decreased possible interactions between yeast and epithelial cells.

489 Cell wall integrity was assayed by zymolyase-induced spheroplast rate, as previously.  
490 Only two strains were statistically different from wild type, CSY7 and CSY10, encoding  
491 respectively *FLO1::SHITT* and *FLO1::synSHITT* motifs. We concluded that the SHITT motif  
492 from *C. glabrata* modified Flo1p function in such a way that budding yeast cell wall  
493 integrity was slightly altered (Figure 6C).

494 Finally, invasion of agar plates was also tested. *C. glabrata* (HM100) and the *srb8-G867A*  
495 mutant were moderately invasive, whereas *ssn6-C1046T* and *tup1-T854A* mutants were  
496 more invasive than any other strain (Figure 6D). We concluded that these three mutations

497 that increased flocculation also increased agar invasion, whereas none of the synthetic  
498 strains (in which *FLO11* and *FLO9* were deleted) showed any invasion of agar plates.

499

500 DISCUSSION

501 **Subtelomeric megasatellites of the same paralogous family exhibit opposite roles**  
502 **in adhesion to epithelial cells**

503 Previous experiments showed that in log phase cells, at least in some strains, *EPA1*  
504 encodes the main adhesin in *C. glabrata* (Cormack *et al.* 1999). Two other subtelomeric  
505 genes, *EPA6* and *EPA7*, are involved in adherence, these genes being normally repressed  
506 by subtelomeric silencing involving the *SIR3* and *RIF1* genes (Castano *et al.* 2005), as well  
507 as a negative regulator element located at 3' ends of these genes (Gallegos-García *et al.*  
508 2012). Subsequent structure-function studies of *EPA1* showed that the length of the  
509 Ser/Thr rich region tandemly repeated in the middle of the protein was important for  
510 cellular adhesion, since when it was shortened below 100 amino acids adhesion was lost.  
511 This was interpreted by the need for the ligand binding N-terminal domain to be projected  
512 away from the membrane-attached domain, in order to interact with the extracellular  
513 environment (Frieman *et al.* 2002). In our present experiments, we tested whether  
514 deleting genes with longer megasatellites would have a more drastic impact on adhesion  
515 but no correlation was found between length of megasatellite in a deleted gene and impact  
516 on adhesion to epithelial cells (Supplemental Figure 2). In addition, several mutants  
517 showed an increased adhesion as compared to wild type (Figure 3B). This was the case  
518 for genes *CAGLOB05061g*, *CAGL0K13024g*, and *CAGL0A04851g*. Note that *CAGL0K13024g*  
519 deletion was shown here to increase adhesion, while mass spectrometry analysis of  
520 *C. glabrata* cell wall peptides identified its product as a *bona fide* cell wall component  
521 (Kraneveld *et al.* 2011). A similar observation was made when deletion of the *FIG2* gene

522 increased cellular adhesion in *S. cerevisiae* (Jue and Lipke 2002). The authors concluded  
523 that the glycosylated part of the Fig2 protein extended far from the cell surface, “hiding”  
524 residues of proteins involved in adhesion. Hence, removing Fig2 would unmask these  
525 residues, thus increasing adhesion.

526 It was previously reported that overexpressing *FLO1* or *FLO5* in *S. cerevisiae* may lead to  
527 opposite effects in coaggregation experiments with other yeasts, such as  
528 *Lachancea thermotolerans* and *Hanseniaspora opuntiae*. This led to the conclusion that  
529 paralogous flocculins exhibit different properties in complex ecosystems containing more  
530 than one yeast species (Rossouw *et al.*). In our experiments, all the megasatellite-  
531 containing genes studied are paralogues (except *CAGL0C00253g* and *CAGL0K13024g*,  
532 Figure 1C). The N-terminal and C-terminal parts of their encoded proteins are therefore  
533 homologous (Rolland *et al.* 2010). However, some deletions are associated to increased  
534 adhesion while others have the opposite effect. This suggests that these paralogues play  
535 different roles in the pathogenic life of *C. glabrata*, faced with distinctive challenges when  
536 infecting a human host.

537 It was previously shown that different *C. glabrata* isolates displayed a wide range of  
538 adhesion properties in a mouse model of infection (Atanasova *et al.* 2013), which is not  
539 surprising given the high genomic variability of this clade (Muller *et al.* 2009; Gabaldon *et*  
540 *al.* 2013; Carreté *et al.* 2019). However, in our present experiments, all strains were built  
541 from the CBS138 reference strain and are therefore isogenic, except for the subset of  
542 deleted megasatellite-containing genes. It is therefore striking that deletion of multiple  
543 megasatellite containing genes did not give a cumulative phenotype. In particular, the  
544 strain in which 11 megasatellite-containing genes were deleted (CGF221) did not show  
545 any adherence defect as compared to wild type.

546

547 Each of these megasatellite-encoded proteins may be present in variable amounts at the  
548 cell surface, and their role in adhesion may depend in complex ways on the total  
549 complement of cell wall proteins. It is possible that those not directly involved in adhesion  
550 may alter the cell wall surface and modify its properties. However, zymolyase  
551 experiments show that none of these deletions induces a detectable decrease in cell wall  
552 integrity, even the large 11-gene deletion. Therefore, it is possible that this category of  
553 genes plays a more important role in different physiological conditions or in more  
554 complex ecological niches. It is interesting to note that adhesion to epithelial cells or to  
555 other *C. glabrata* cells are not mediated by the same genes to the exception of  
556 *CAGLOB05061g* and *CAGLOA04851g*, suggesting that these two genes negatively control  
557 all cell-to-cell interactions.

558

### 559 **Directed evolution experiments do not select megasatellite amplification**

560 Former evolution experiments in *S. cerevisiae* used either limiting growth condition, like  
561 glucose (Dunham *et al.* 2002), gene dosage assay of a ribosomal protein (Kozul *et al.*  
562 2004) or partially deficient tRNA synthetase (Thierry *et al.* 2015) to select mutants that  
563 would grow like wild type in challenging conditions. Chromosomal duplications of large  
564 DNA segments were frequently observed, involved retrotransposons, LTRs or  
565 microsatellites (Payen *et al.* 2008). In the present evolution experiments, we expected to  
566 select the local amplification of a megasatellite seed inserted in the *FLO1* gene, by  
567 selecting [Flo+] revertants from [Flo-] cells. *FLO1* was chosen because it shows a wide  
568 variety of phenotypes directly correlated to expression level (Smukalla *et al.* 2008) and to  
569 megasatellite length (Verstrepen *et al.* 2005). [Flo+] revertants involving megasatellite  
570 amplification were never observed after more than 200 generations. Instead, revertants  
571 corresponded to mutations in general transcription factors such as *SSN6-TUP1* (Chen *et*



572 *al.* 2013), *SRB8* (Núñez *et al.* 2007) or *ACE2* (Ratcliff *et al.* 2012, 2015; Oud *et al.* 2013).  
573 All these mutations happened in the control BY4741 or its *flo1Δ* derivative, mutated for  
574 the *FLO8* transcription activator (Table 1 and Supplemental Table 3). The only [Flo+]  
575 revertant that was identified in one of the non-control strains was a segmental duplication  
576 of 230 kb on chromosome II, encompassing more than 100 genes and involving two Ty  
577 elements, reminiscent of similar duplications in other experimental systems (Dunham *et*  
578 *al.* 2002; Koszul *et al.* 2004; Thierry *et al.* 2015). No local duplication of a megasatellite  
579 seed was detected, not even in the strain containing two FLO motifs that could easily  
580 duplicate by replication or recombination slippage (Richard and Pâques 2000; Richard *et*  
581 *al.* 2008). Note that in our experiments, there is no limiting factor, cells were grown in  
582 rich medium under constant oxygenation. These conditions of rapid growth may favor  
583 large segmental duplications over local slippages. Growing cells in more stressful  
584 conditions or at a lower temperature to slow down replication may increase chances to  
585 detect other kinds of mutations.

586

### 587 **Differential functions of synthetic megasatellites in *S. cerevisiae***

588 One striking result of our experiments is that one given megasatellite may not be replaced  
589 by another one of the same length without losing some cell properties. The fact that the  
590 synFLO, synSHITT and synFLOamy strains all flocculated while synALS did not flocculate,  
591 shows that one tandem repeat may not necessarily substitute to another one of the same  
592 length to perform the same function (Figure 6A). Similarly, the synFLOamy strain  
593 exhibited reduced adhesion to epithelial cells as compared to the synFLO strain and other  
594 synthetic strains. This shows that replacing the FLO megasatellite by megasatellites from  
595 adherent pathogenic yeasts (synALS and synSHITT) is not sufficient to increase  
596 *S. cerevisiae* adhesion to epithelial cells, unlike expressing intact *EPA1*, for example

597 (Cormack *et al.* 1999). These data demonstrate that the tested megasatellites themselves  
598 are not able to increase adherence to epithelial cells, but almost certainly work in  
599 conjunction with other domains in their resident protein to carry out this function.

600 In previous work comparing different phenotypes of natural *S. cerevisiae* isolates, the  
601 authors also concluded that no correlation could be found between flocculation and  
602 invasion phenotypes (Hope and Dunham 2014). However, large genetic differences  
603 existed between the different isolates. In our experiments all strains are perfectly isogenic  
604 except for the *FLO1* megasatellite sequence. We also found no correlation between the  
605 ability to flocculate (synFLO, synSHITT and synFLOamy all flocculate) and to invade agar  
606 (none of the synthetic strains were able to invade).

607

## 608 **Conclusions**

609 In all, our study shows that megasatellites contribute to cell surface phenomena like  
610 adherence and flocculation, but in a complex manner. While, for example, we could  
611 document a role for particular megasatellite genes in adherence, the deletion of 11  
612 megasatellite genes in CBS138 did not strongly alter its adherence, nor its cell wall  
613 integrity. We also found a role for megasatellite repeats in function of the flocculin Flo1,  
614 and show that function was affected by particular megasatellite sequences, as opposed to  
615 these sequences simply acting as a spacer of a given length. Lastly, we did not find  
616 evidence that any of the megasatellite repeats tested were direct mediators of adherence,  
617 or agar invasion, since their expression in the context of the Flo1 flocculin permitted  
618 flocculation but not adherence or agar invasion. It seems likely, therefore, that they  
619 contribute by functioning with other domains of the proteins in which they are encoded.

620

621

## ACKNOWLEDGEMENTS

622 This work was supported by the Institut Pasteur, the Centre National de la Recherche  
623 Scientifique (CNRS), by an ANR grant to B.D. (project DYGEVO) and by grant  
624 R01AI046223 to B.P.C. We wish to thank Maria Teresa Teixeira for helpful advices to  
625 design the telomeric disruption plasmid, pMEG3.

626

627

## REFERENCES

- 628 Atanasova R., A. Angoulvant, M. Tefit, F. Gay, J. Guitard, *et al.*, 2013 A mouse model for  
629 *Candida glabrata* hematogenous disseminated infection starting from the gut:  
630 evaluation of strains with different adhesion properties. PLoS One 8: e69664.  
631 <https://doi.org/10.1371/journal.pone.0069664>
- 632 Barre B., J. Hallin, J.-X. Yue, K. Persson, E. Mikhalev, *et al.*, 2019 Intragenic repeat  
633 expansions control yeast chronological aging. bioRxiv.
- 634 Baudin A., O. Ozier-Kalogeropoulos, A. Denouel, F. Lacroute, and C. Cullin, 1993 A simple  
635 and efficient method for direct gene deletion in *Saccharomyces cerevisiae*. Nucleic  
636 Acids Res 21: 3329–3330.
- 637 Bowen S., C. Roberts, and A. E. Wheals, 2005 Patterns of polymorphism and divergence  
638 in stress-related yeast proteins. Yeast 22: 659–668.
- 639 Carreté L., E. Ksiezopolska, E. Gómez-Molero, A. Angoulvant, O. Bader, *et al.*, 2019  
640 Genome Comparisons of *Candida glabrata* Serial Clinical Isolates Reveal Patterns of  
641 Genetic Variation in Infecting Clonal Populations. Front. Microbiol. 10.  
642 <https://doi.org/10.3389/fmicb.2019.00112>
- 643 Castano I., S.-J. Pan, M. Zupancic, C. Hennequin, B. Dujon, *et al.*, 2005 Telomere length  
644 control and transcriptional regulation of subtelomeric adhesins in *Candida glabrata*.  
645 Mol. Microbiol. 55: 1246–1258.
- 646 Chen K., M. A. Wilson, C. Hirsch, A. Watson, S. Liang, *et al.*, 2013 Stabilization of the

647 promoter nucleosomes in nucleosome-free regions by the yeast Cyc8–Tup1  
648 corepressor. *Genome Res.* 23: 312–322. <https://doi.org/10.1101/gr.141952.112>  
649 Cormack B. P., N. Ghorri, and S. Falkow, 1999 An adhesin of the yeast pathogen *Candida*  
650 *glabrata* mediating adherence to human epithelial cells. *Science* 285: 578–582.  
651 De Las Penas A., S. J. Pan, I. Castano, J. Alder, R. Cregg, *et al.*, 2003 Virulence-related  
652 surface glycoproteins in the yeast pathogen *Candida glabrata* are encoded in  
653 subtelomeric clusters and subject to RAP1- and SIR-dependent transcriptional  
654 silencing. *Genes Dev* 17: 2245–58.  
655 Descorps-Declère S., C. Saguez, A. Cournac, M. Marbouty, T. Rolland, *et al.*, 2015 Genome-  
656 wide replication landscape of *Candida glabrata*. *BMC Biol.* 13: 69.  
657 <https://doi.org/10.1186/s12915-015-0177-6>  
658 Dujon B., D. Sherman, G. Fischer, P. Durrens, S. Casaregola, *et al.*, 2004 Genome evolution  
659 in yeasts. *Nature* 430: 35–44.  
660 Dunham M. J., H. Badrane, T. Ferea, J. Adams, P. O. Brown, *et al.*, 2002 Characteristic  
661 genome rearrangements in experimental evolution of *Saccharomyces cerevisiae*.  
662 *Proc. Natl. Acad. Sci.* 99: 16144–16149. <https://doi.org/10.1073/pnas.242624799>  
663 Fidalgo M., R. R. Barrales, J. I. Ibeas, and J. Jimenez, 2006 Adaptive evolution by  
664 mutations in the FLO11 gene. *Proc. Natl. Acad. Sci.* 103: 11228–11233.  
665 <https://doi.org/10.1073/pnas.0601713103>  
666 Frieman M. B., J. M. McCaffery, and B. P. Cormack, 2002 Modular domain structure in the  
667 *Candida glabrata* adhesin Epa1p, a  $\beta$ 1,6 glucan-cross-linked cell wall protein. *Mol.*  
668 *Microbiol.* 46: 479–492.  
669 Gabaldon T., T. Martin, M. Marcet-Houben, P. Durrens, M. Bolotin-Fukuhara, *et al.*, 2013  
670 Comparative genomics of emerging pathogens in the *Candida glabrata* clade. *BMC*  
671 *Genomics* 14: 623. <https://doi.org/10.1186/1471-2164-14-623>

672 Gallegos-García V., S.-J. Pan, J. Juárez-Cepeda, C. Y. Ramírez-Zavaleta, M. B. Martin-del-  
673 Campo, *et al.*, 2012 A novel downstream regulatory element cooperates with the  
674 silencing machinery to repress EPA1 expression in *Candida glabrata*. *Genetics* 190:  
675 1285–1297. <https://doi.org/10.1534/genetics.111.138099>

676 Gietz R. D., R. H. Schiestl, A. R. Willems, and R. A. Woods, 1995 Studies on the  
677 transformation of intact yeast cells by the LiAc/SS-DNA/PEG procedure. *Yeast* 11:  
678 355–60.

679 Hope E. A., and M. J. Dunham, 2014 Ploidy-Regulated Variation in Biofilm-Related  
680 Phenotypes in Natural Isolates of *Saccharomyces cerevisiae*. *G3 Genes Genomes*  
681 *Genet.* 4: 1773–1786. <https://doi.org/10.1534/g3.114.013250>

682 Hoyer L. L., 2001 The ALS gene family of *Candida albicans*. *Trends Microbiol.* 9: 176–  
683 180.

684 International Human Genome Sequencing Consortium, 2001 Initial sequencing and  
685 analysis of the human genome. *Nature* 409: 860–921.

686 Jue C. K., and P. N. Lipke, 2002 Role of Fig2p in Agglutination in *Saccharomyces*  
687 *cerevisiae*. *Eukaryot. Cell* 1: 843–845. <https://doi.org/10.1128/EC.1.5.843-845.2002>

688 Kachouri-Lafond R., B. Dujon, E. Gilson, E. Westhof, C. Fairhead, *et al.*, 2009 Large  
689 telomerase RNA, telomere length heterogeneity and escape from senescence in  
690 *Candida glabrata*. *FEBS Lett.* 583: 3605–3610.

691 Koszul R., S. Caburet, B. Dujon, and G. Fischer, 2004 Eucaryotic genome evolution  
692 through the spontaneous duplication of large chromosomal segments. *EMBO J* 23:  
693 234–43.

694 Kraneveld E. A., J. J. de Soet, D. M. Deng, H. L. Dekker, C. G. de Koster, *et al.*, 2011  
695 Identification and Differential Gene Expression of Adhesin-Like Wall Proteins in  
696 *Candida glabrata* Biofilms. *Mycopathologia* 172: 415–427.

- 697 <https://doi.org/10.1007/s11046-011-9446-2>
- 698 Liu H., C. A. Styles, and G. R. Fink, 1996 *Saccharomyces cerevisiae* S288C Has a Mutation  
699 in FL08, a Gene Required for Filamentous Growth. *Genetics* 144: 967–978.
- 700 Malpertuy A., B. Dujon, and G.-F. Richard, 2003 Analysis of microsatellites in 13  
701 hemiascomycetous yeast species: mechanisms involved in genome dynamics. *J. Mol.*  
702 *Evol.* 56: 730–741.
- 703 Millot G., 2011 *Comprendre et réaliser les tests statistiques à l'aide de R*. de boeck,  
704 Brussels.
- 705 Muller H., A. Thierry, J.-Y. Coppée, C. Gouyette, C. Hennequin, *et al.*, 2009 Genomic  
706 polymorphism in the population of *Candida glabrata*: gene copy-number variation  
707 and chromosomal translocations. *Fungal Genet. Biol.* doi: 10.1016/j.fgb.2008.11.006.
- 708 Núñez L., M. I. González-Siso, M. Becerra, and M. E. Cerdán, 2007 Functional motifs  
709 outside the kinase domain of yeast Srb10p. Their role in transcriptional regulation  
710 and protein-interactions with Tup1p and Srb11p. *Biochim. Biophys. Acta BBA -*  
711 *Proteins Proteomics* 1774: 1227–1235.  
712 <https://doi.org/10.1016/j.bbapap.2007.06.012>
- 713 Oud B., V. Guadalupe-Medina, J. F. Nijkamp, D. de Ridder, J. T. Pronk, *et al.*, 2013 Genome  
714 duplication and mutations in ACE2 cause multicellular, fast-sedimenting phenotypes  
715 in evolved *Saccharomyces cerevisiae*. *Proc. Natl. Acad. Sci. U. S. A.* 110: E4223-4231.  
716 <https://doi.org/10.1073/pnas.1305949110>
- 717 Ovalle R., S. T. Lim, B. Holder, C. K. Jue, C. W. Moore, *et al.*, 1998 A spheroplast rate assay  
718 for determination of cell wall integrity in yeast. *Yeast* 14: 1159–1166.  
719 [https://doi.org/10.1002/\(SICI\)1097-0061\(19980930\)14:13<1159::AID-](https://doi.org/10.1002/(SICI)1097-0061(19980930)14:13<1159::AID-YEA317>3.0.CO;2-3)  
720 [YEA317>3.0.CO;2-3](https://doi.org/10.1002/(SICI)1097-0061(19980930)14:13<1159::AID-YEA317>3.0.CO;2-3)
- 721 Payen C., R. Koszul, B. Dujon, and G. Fischer, 2008 Segmental duplications arise from

- 722 Pol32-dependent repair of broken forks through two alternative replication-based  
723 mechanisms. *Plos Genet.* 5: e1000175.
- 724 Ramsook C. B., C. Tan, M. C. Garcia, R. Fung, G. Soybelman, *et al.*, 2010 Yeast Cell  
725 Adhesion Molecules Have Functional Amyloid-Forming Sequences. *Eukaryot. Cell* 9:  
726 393. <https://doi.org/10.1128/EC.00068-09>
- 727 Ratcliff W. C., R. F. Denison, M. Borrello, and M. Travisano, 2012 Experimental evolution  
728 of multicellularity. *Proc. Natl. Acad. Sci.* 109: 1595–1600.  
729 <https://doi.org/10.1073/pnas.1115323109>
- 730 Ratcliff W. C., J. D. Fankhauser, D. W. Rogers, D. Greig, and M. Travisano, 2015 Origins of  
731 multicellular evolvability in snowflake yeast. *Nat. Commun.* 6: 6102.  
732 <https://doi.org/10.1038/ncomms7102>
- 733 Richard G.-F., and F. Pâques, 2000 Mini- and microsatellite expansions: the  
734 recombination connection. *EMBO Rep.* 1: 122–126.
- 735 Richard G.-F., and B. Dujon, 2006 Molecular evolution of minisatellites in  
736 hemiascomycetous yeasts. *Mol Biol Evol* 23: 189–202.
- 737 Richard G.-F., A. Kerrest, and B. Dujon, 2008 Comparative genomics and molecular  
738 dynamics of DNA repeats in eukaryotes. *Microbiol Mol Biol Rev* 72: 686–727.
- 739 Rolland T., B. Dujon, and G. F. Richard, 2010 Dynamic evolution of megasatellites in  
740 yeasts. *Nucleic Acids Res.* 38: 4731–4739.
- 741 Rossouw D., S. P. Meiring, and F. F. Bauer, Modifying *Saccharomyces cerevisiae* Adhesion  
742 Properties Regulates Yeast Ecosystem Dynamics. *mSphere* 3: e00383-18.  
743 <https://doi.org/10.1128/mSphere.00383-18>
- 744 Sandell L. L., and V. A. Zakian, 1993 Loss of a yeast telomere: arrest, recovery, and  
745 chromosome loss. *Cell* 75: 729–39.
- 746 Sherer S., and R. W. Davis, 1979 Replacement of chromosome segments with altered

- 747 DNA sequences constructed in vitro. *Proc Natl Acad Sci USA* 76: 4951–4955.
- 748 Sikorski R. S., and P. Hieter, 1989 A system of shuttle vectors and yeast host strains  
749 designed for efficient manipulation of DNA in *Saccharomyces cerevisiae*. *Genetics*  
750 122: 19–27.
- 751 Smukalla S., M. Caldara, N. Pochet, A. Beauvais, S. Guadagnini, *et al.*, 2008 FLO1 Is a  
752 Variable Green Beard Gene that Drives Biofilm-like Cooperation in Budding Yeast. *Cell*  
753 135: 726–737. <https://doi.org/10.1016/j.cell.2008.09.037>
- 754 Tekaia F., B. Dujon, and G.-F. Richard, 2013 Detection and characterization of  
755 megasatellites in orthologous and nonorthologous genes of 21 fungal genomes.  
756 *Eukaryot Cell* 12: 794–803. <https://doi.org/10.1128/EC.00001-13>
- 757 Thierry A., C. Bouchier, B. Dujon, and G.-F. Richard, 2008 Megasatellites: a peculiar class  
758 of giant minisatellites in genes involved in cell adhesion and pathogenicity in *Candida*  
759 *glabrata*. *Nucl Acids Res* 36: 5970–5982.
- 760 Thierry A., B. Dujon, and G.-F. Richard, 2009 Megasatellites: a new class of large tandem  
761 repeats discovered in the pathogenic yeast *Candida glabrata*. *Cell. Mol. Life Sci.* 67:  
762 671–676.
- 763 Thierry A., V. Khanna, S. Créno, I. Lafontaine, L. Ma, *et al.*, 2015 Macrotene chromosomes  
764 provide insights to a new mechanism of high-order gene amplification in eukaryotes.  
765 *Nat. Commun.* 6: 6154. <https://doi.org/10.1038/ncomms7154>
- 766 Verstrepen K. J., A. Jansen, F. Lewitter, and G. R. Fink, 2005 Intragenic tandem repeats  
767 generate functional variability. *Nat. Genet.* 37: 986–990.
- 768 Viterbo D., A. Marchal, V. Mosbach, L. Poggi, W. Vaysse-Zinkhöfer, *et al.*, 2018 A fast,  
769 sensitive and cost-effective method for nucleic acid detection using non-radioactive  
770 probes. *Biol. Methods Protoc.* 3. <https://doi.org/10.1093/biomethods/bpy006>
- 771 Xu Z., B. Green, N. Benoit, M. Schatz, S. Wheelan, *et al.*, De novo genome assembly of



772 Candida glabrata reveals cell wall protein complement and structure of dispersed  
773 tandem repeat arrays. Mol. Microbiol. n/a. <https://doi.org/10.1111/mmi.14488>  
774  
775

776

## FIGURE LEGENDS

### 777 **Figure 1: Megasatellite distribution in *Candida glabrata***

778 **A:** Tandem repeats detected in 21 fungal genomes were plotted as a function of motif  
779 length (Tekaiia *et al.* 2013). The transition from minisatellites to megasatellites was set  
780 around 90 bp (dotted line). Note that minisatellites whose motif was shorter than 40 bp  
781 were not shown for the sake of clarity. **B:** General organization of a megasatellite-  
782 containing gene. The 5' end of the gene, before the tandem repeat, is usually 1-2 kb, while  
783 the 3' end exhibits more length variability. Motifs are always in frame and their number  
784 ranges from 3 to 30 in *C. glabrata*. **C:** Telomeric megasatellites in *C. glabrata*. Chromosome  
785 numbers are indicated to the left, along with the telomeric arm. The bracket includes all  
786 the genes part of a large paralogous family. SHITT and SFFIT motifs are indicated by a  
787 color code, orange or blue respectively. Motifs in dark grey are intervening sequences.  
788 *CAGL0L00227g* contains large regions almost entirely made of glycine and serine residues  
789 (S-G) or alanine, glycine and asparagine residues (A-G-N), extending sometimes over  
790 considerable distances. Note that two megasatellite-containing genes (*CAGL0E00231g*  
791 and *CAGL0C00253g*) could not be deleted despite repetitive attempts and are therefore  
792 indicated in light grey. All megasatellite-containing genes shown here are the last gene  
793 before the telomere, except in four cases (*CAGL0E00231g*, *CAGL0F00099g*, *CAGL0L00227g*  
794 and *CAGL0C00253g*). In these four cases, the gene(s) between the megasatellite and the  
795 telomere are indicated. All drawings are oriented in such a way that telomeric ends are  
796 on the right. **D:** Experimental setup to delete telomeric megasatellites. A PCR product  
797 containing 1 kb of DNA upstream the repeat tract was cloned at the *KpnI* site of pMEG3.  
798 The resulting plasmid was then linearized with *SacII* and transformed into *C. glabrata*.  
799 Homologous recombination with the telomeric sequence led to the deletion of all  
800 sequences downstream the PCR product and addition of a new telomere on the telomeric

801 seed. Spontaneous single-strand annealing events between the two tandem repeats (*TR*,  
802 in blue) were selected on 5-FOA medium, so that the resulting strain could be deleted  
803 again with *URA3*. Up to 11 megasatellites were iteratively deleted using this approach.

804

805 **Figure 2: Molecular analysis of megasatellite deleted strains.**

806 **A:** Southern blot hybridized with two different probes. Wild-type controls are shown in  
807 green (CBS138 and BG2), strains after transformation but before 5-FOA selection are in  
808 red (CGF1-4), several clones of the same strains after 5-FOA selection are in black. Top:  
809 hybridization with the *URA3* probe was positive in the four *URA3*-containing strains and  
810 showed as expected different integration sites, depending on the targeted megasatellite.  
811 Bottom: hybridization with the tandem repeat (*TR*) probe shows telomere length  
812 variability in the different subclones analyzed, after 5-FOA selection. Expected molecular  
813 weights in strains before and after 5-FOA selection. **B:** Pulse-field gel electrophoresis of  
814 strains after 5-FOA selection. Top: Southern blot hybridization with the *TR* probe  
815 highlights chromosomes carrying the tandem repeat. Strains are classified from left to  
816 right in the order in which megasatellites were deleted. The cartoon below the blot  
817 depicts the expected pattern, which is strictly identical to the observed hybridization  
818 result.

819

820 **Figure 3: Adhesion to epithelial cells of megasatellite mutants**

821 **A:** Experimental protocol. Adhesion values were calculated as output CFU (yeasts bound  
822 to Lec2 cells) over input CFU (yeasts before incubation with Lec2 cells). **B:** Adhesion  
823 values relative to wild type (CBS138 or BG2, depending on the mutant tested). Each  
824 diamond corresponds to one experiment, each experiment being the average of an  
825 adhesion test performed in triplicate. Note that wild type values are not included in the

826 graph, since adhesion values in each mutant strain were divided by the adhesion value in  
827 the wild-type strain, independently determined for each experiment. Deletions that  
828 statistically increased adhesion (ratios to wild type above 1) are boxed in red, those that  
829 significantly decreased adhesion (ratios to wild type below 1) are boxed in green. Non-  
830 parametric Mann-Whitney tests were performed, asterisks showing significance levels: \*  
831 p-value < 5%, \*\* p-value < 1%, \*\*\* p-value < 0.1%. Note that gene names are abbreviated  
832 for figure clarity, e. g. *CAGLOB05061g* was abbreviated by B05061. **C:** Summary of iterative  
833 deletions in multiple mutants. Two series of iterative deletions were made, one starting  
834 with *CAGLOA04851g* deletion, the other with *CAGLOB05061g* deletion. Note that deletion  
835 of *CAGL0L00227g* also deleted the telomere-proximal downstream gene *CAGL0L00157g*.

836

#### 837 **Figure 4: Flocculation and cell integrity experiments in *C. glabrata* mutants**

838 **A:** Flocculation. Cell concentration as determined by optical density at 600 nm was  
839 determined for each strain. Error bars correspond to 95% confidence intervals. Student  
840 t-tests comparing each mutant to the reference HM100 strain were performed, asterisks  
841 showing significance levels: \* p-value < 5%, \*\* p-value < 1%, \*\*\* p-value < 0.1%. **B:** Cell wall  
842 integrity. Optical density at 600 nm after zymolyase treatment is shown for each strain.  
843 Error bars are one standard deviation. No statistically significant difference was found  
844 among strains, by a Student t-test.

845

#### 846 **Figure 5: Evolution toward flocculation experimental setup.**

847 **A:** The wild-type *FLO1* gene was modified by the two-step replacement method, in such a  
848 way that the regular megasatellite was entirely deleted or replaced with one SHITT, one  
849 ALS, one FLO or two FLO motifs. Replacements did not disrupt the reading frame. **B:**  
850 Mutant strains as well as wild-type and *flo1Δ* controls were incubated in parallel

851 bioreactors under constant oxygenation. The oxygen vents reached the bottom of each  
852 glass tube; in order to give a selective advantage to flocculating cells. Each time a [Flo+]  
853 mutant appeared, it was confirmed by a larger culture in flask allowing to assess the  
854 presence of large flocs each containing millions of yeast cells. These mutants were  
855 subsequently tested for dominance/recessivity and complementation tests with known  
856 flocculation mutants. **C:** Strain CSY5, containing a *FLO1* gene with only one FLO motif, was  
857 modified by the two-step replacement method so that the *FLO1* synthetic gene contained  
858 10 copies in tandem of the FLO motif, of the SHITT motif or of the FLOamy motif, or 13  
859 copies of the ALS motif, so that the total megasatellite length is approximately the same  
860 in all cases.

861

#### 862 **Figure 6: Results of phenotypic tests on mutant *FLO1* strains**

863 **A:** Flocculation. Cell concentration as determined by optical density at 600 nm was  
864 determined for each strain. Error bars correspond to 95% confidence intervals. Student  
865 t-tests comparing each mutant to the reference BY4741 strain were performed, asterisks  
866 showing significance levels: \* p-value < 5%, \*\* p-value < 1%, \*\*\* p-value < 0.1%. **B:**  
867 Adhesion to epithelial cells. Experiments were performed as in Figure 3, and results are  
868 shown as ratios to BY4741 reference strain. Error bars correspond to 95% confidence  
869 intervals. Non-parametric Mann-Whitney tests were performed, the only strain  
870 statistically different from BY4741 contains the synthetic FLOamy construct and is  
871 marked by an asterisk (p-value < 5%). **C:** Cell wall integrity. Optical density at 600 nm after  
872 zymolyase treatment is shown for each strain. Error bars are one standard deviation.  
873 Student t-tests comparing each mutant to the reference BY4741 strain were performed,  
874 asterisks showing significant differences (p-value < 5%). **D:** Invasion of agar plates.  
875 Pictures of each plate were taken 24 hours after water washes (Materials & Methods).

876 Two strains show weak adhesion (HM100 and *srb8*-G867A, yellow squares) and two  
877 strains show strong adhesion (*ssn6*-C1046T and *flo1* $\Delta$  *tup1*-T854A, red squares).

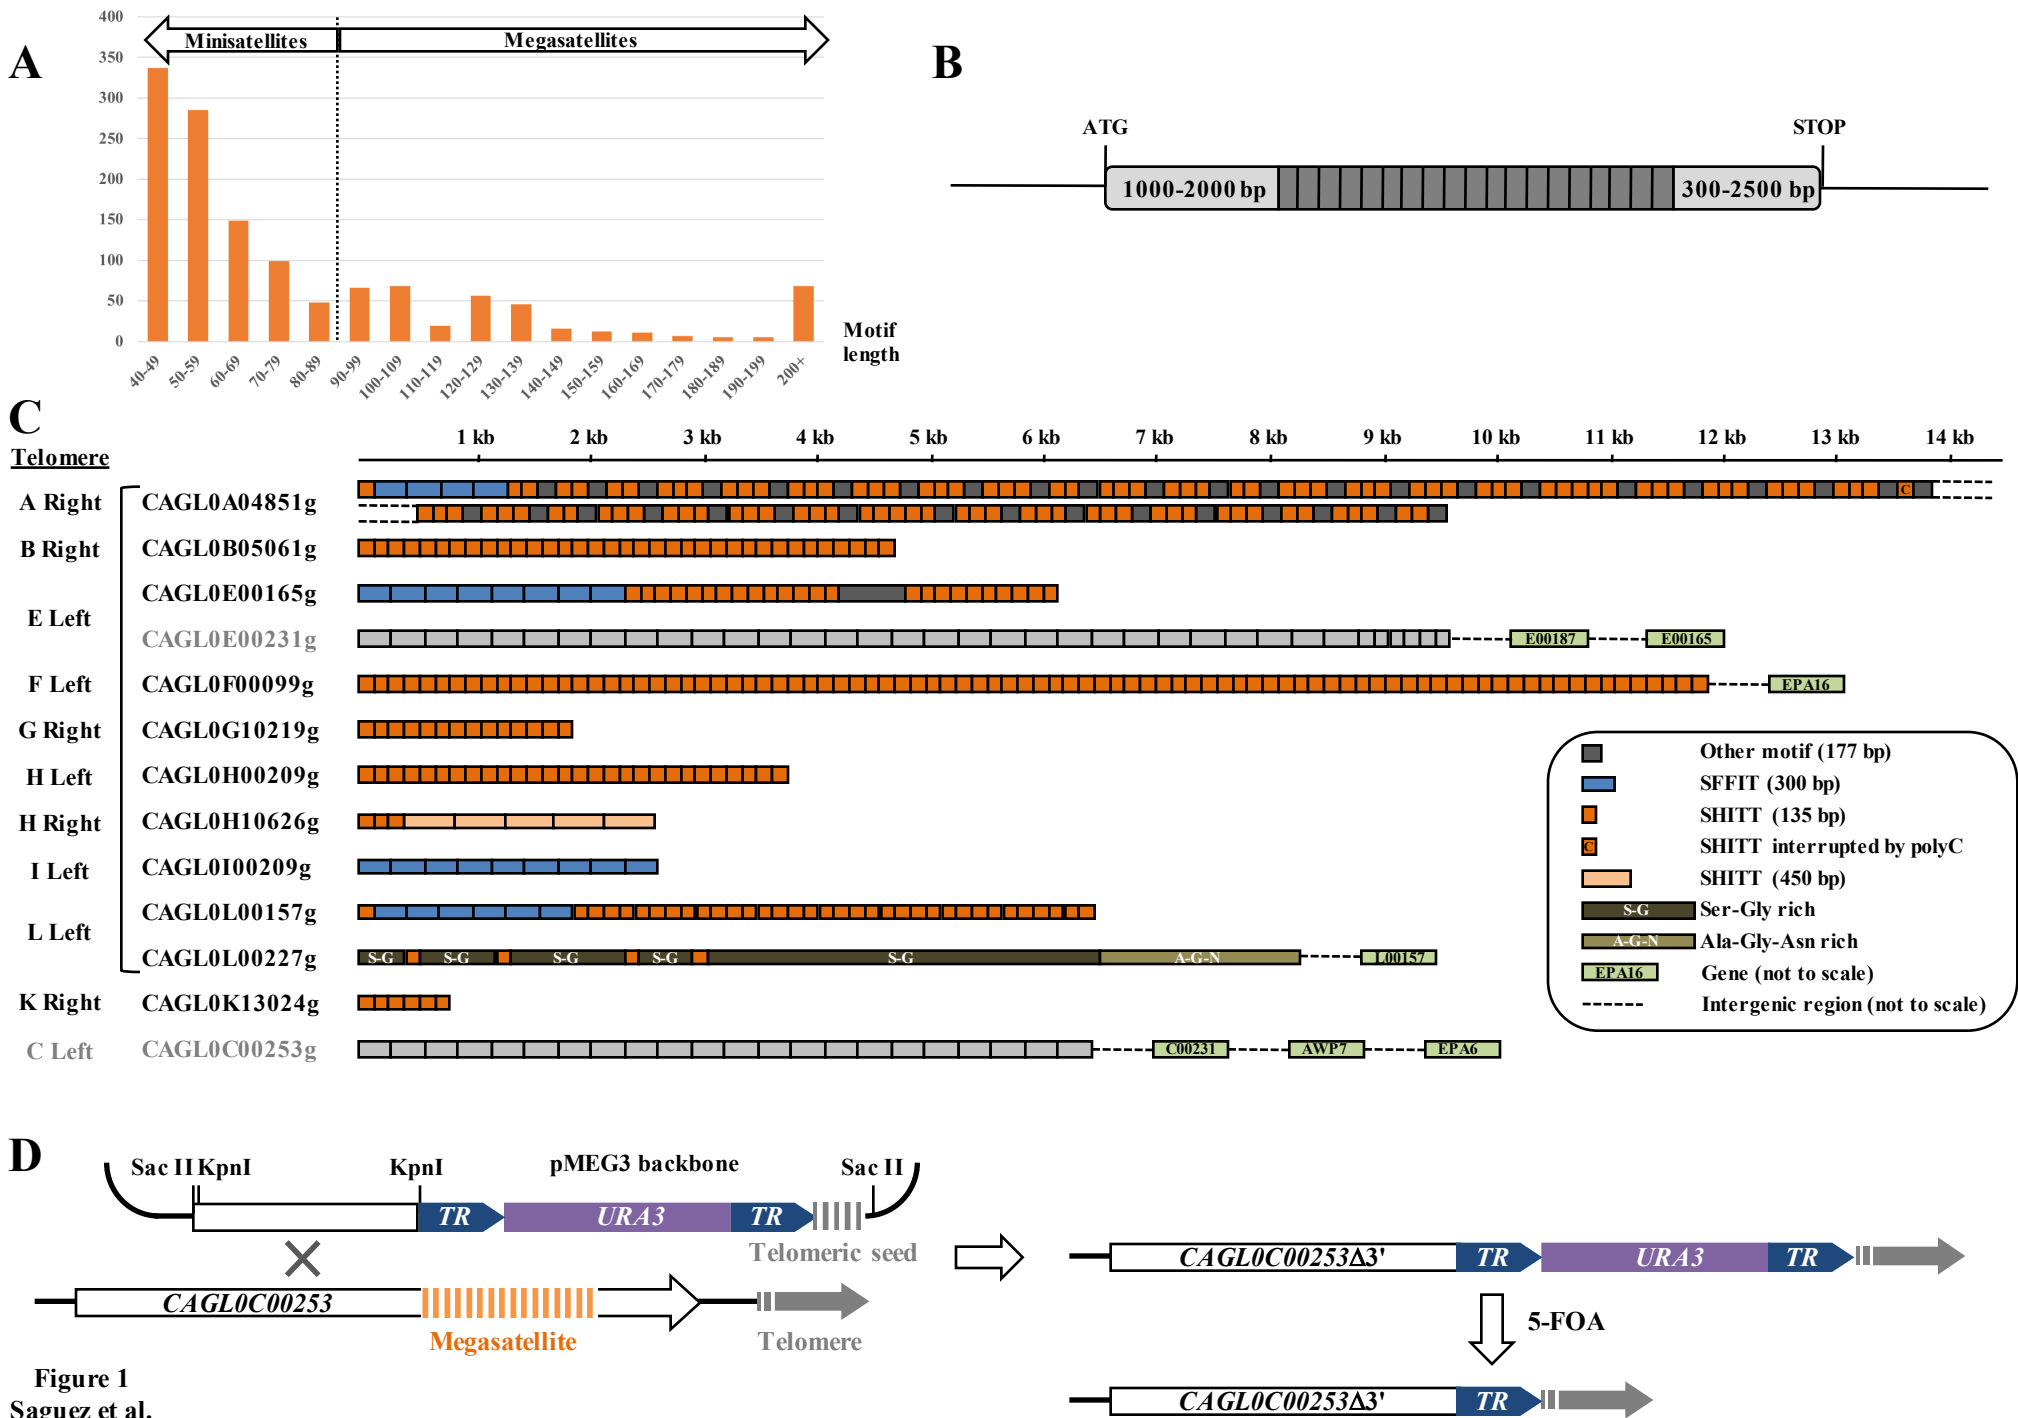

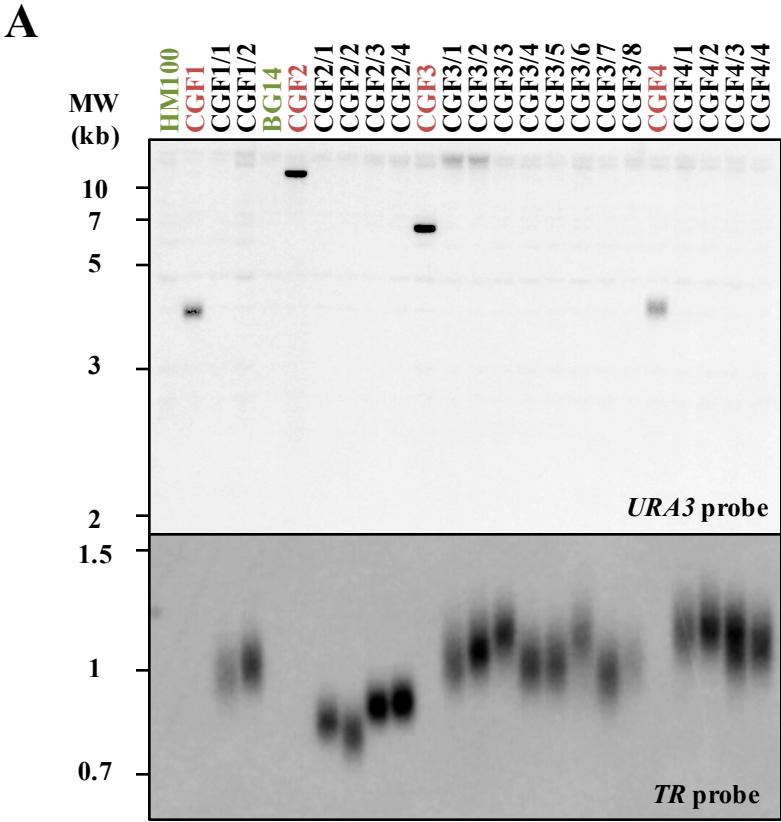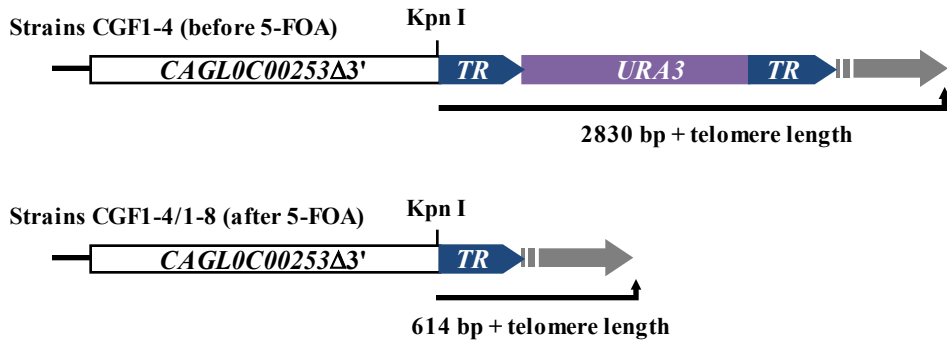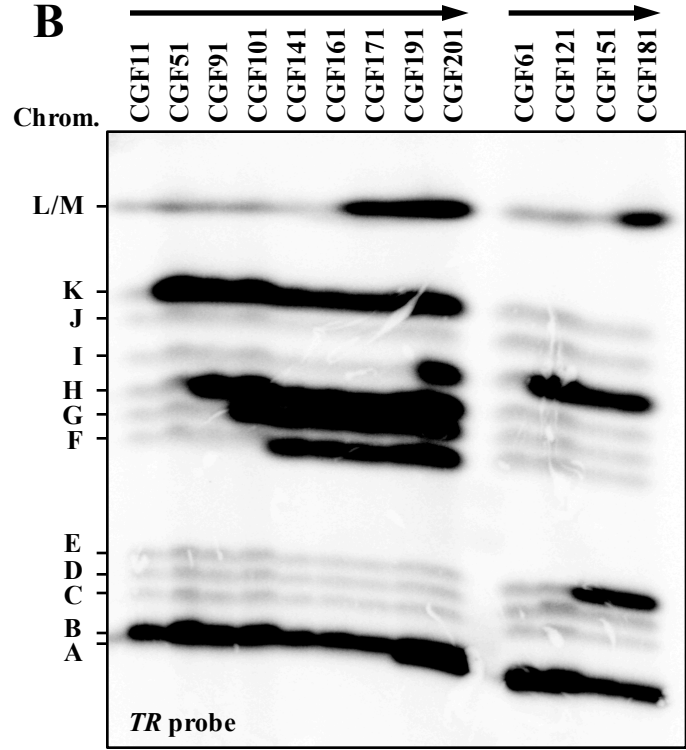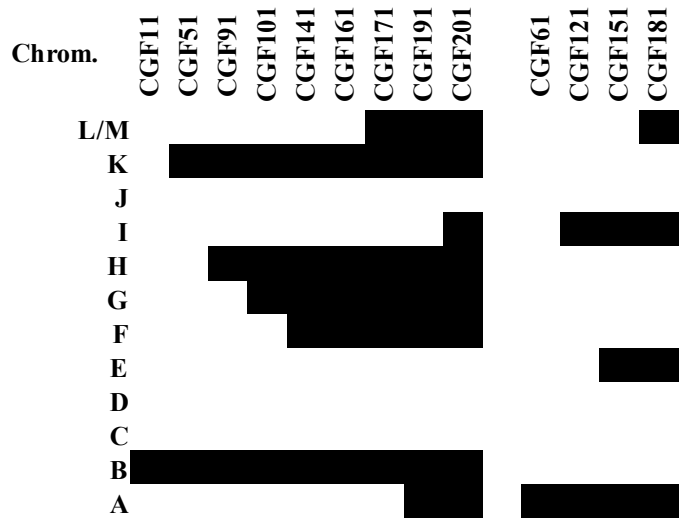

Figure 2  
Saguez et al.



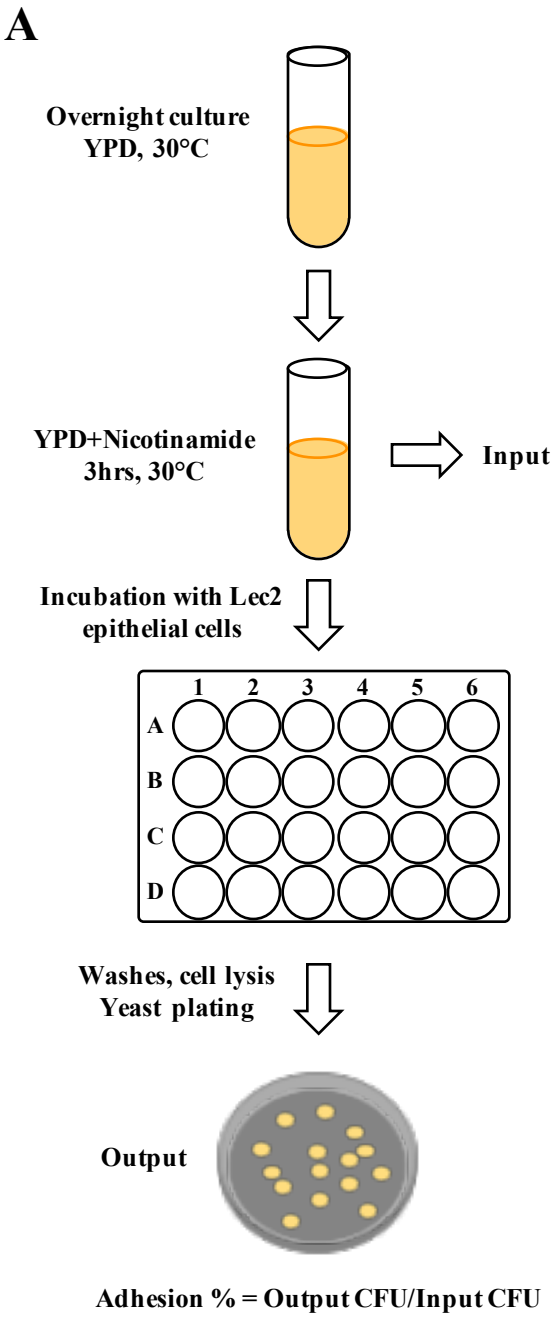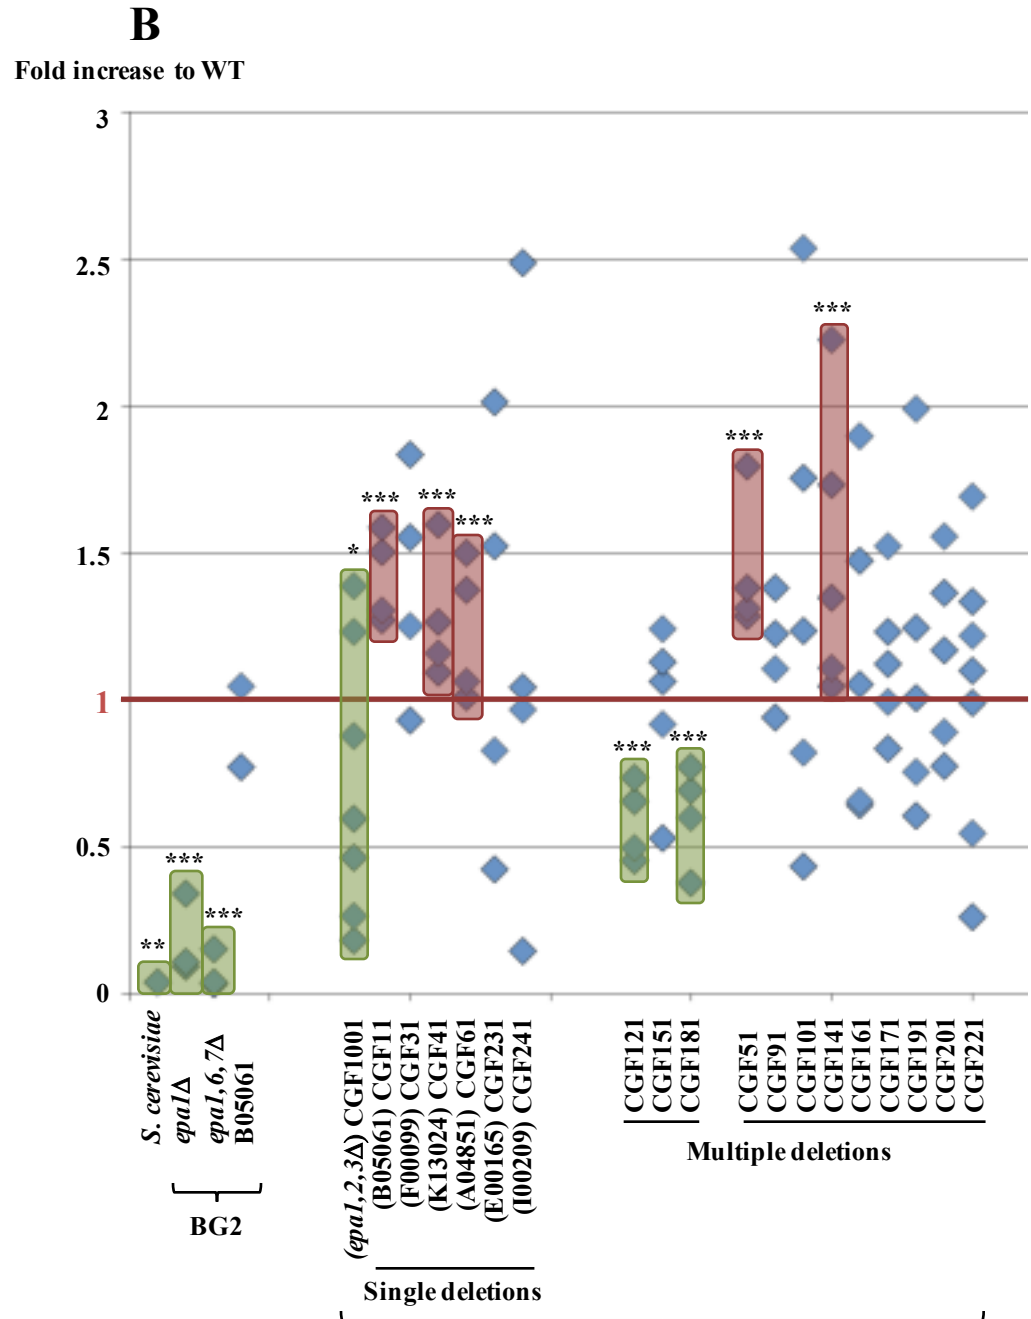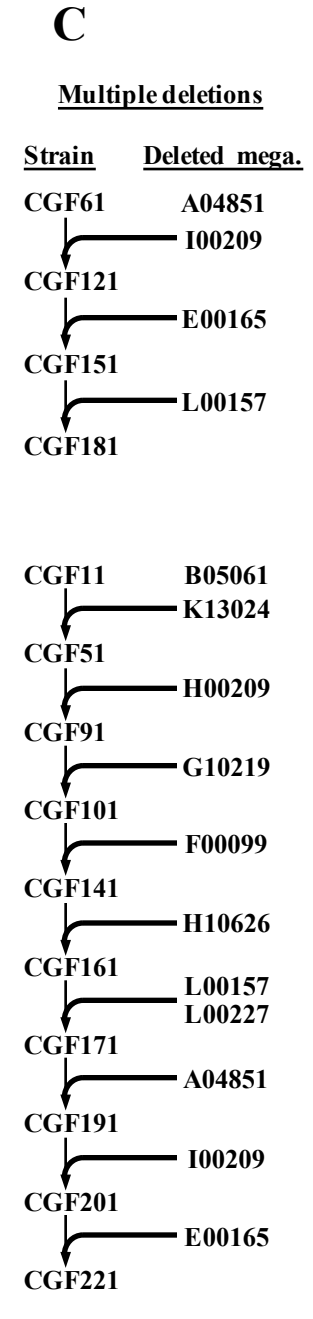

Figure 3  
Saguez et al.

CBS138

## A Flocculation assay

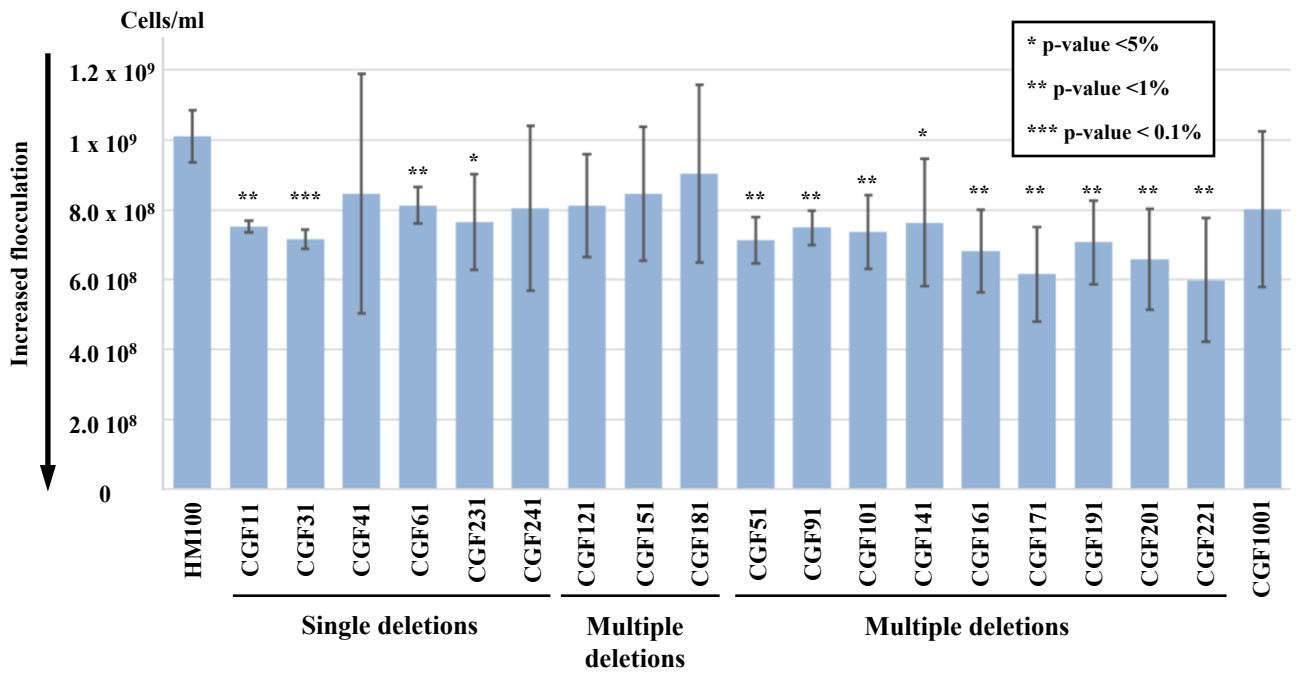

## B Cell wall integrity assay

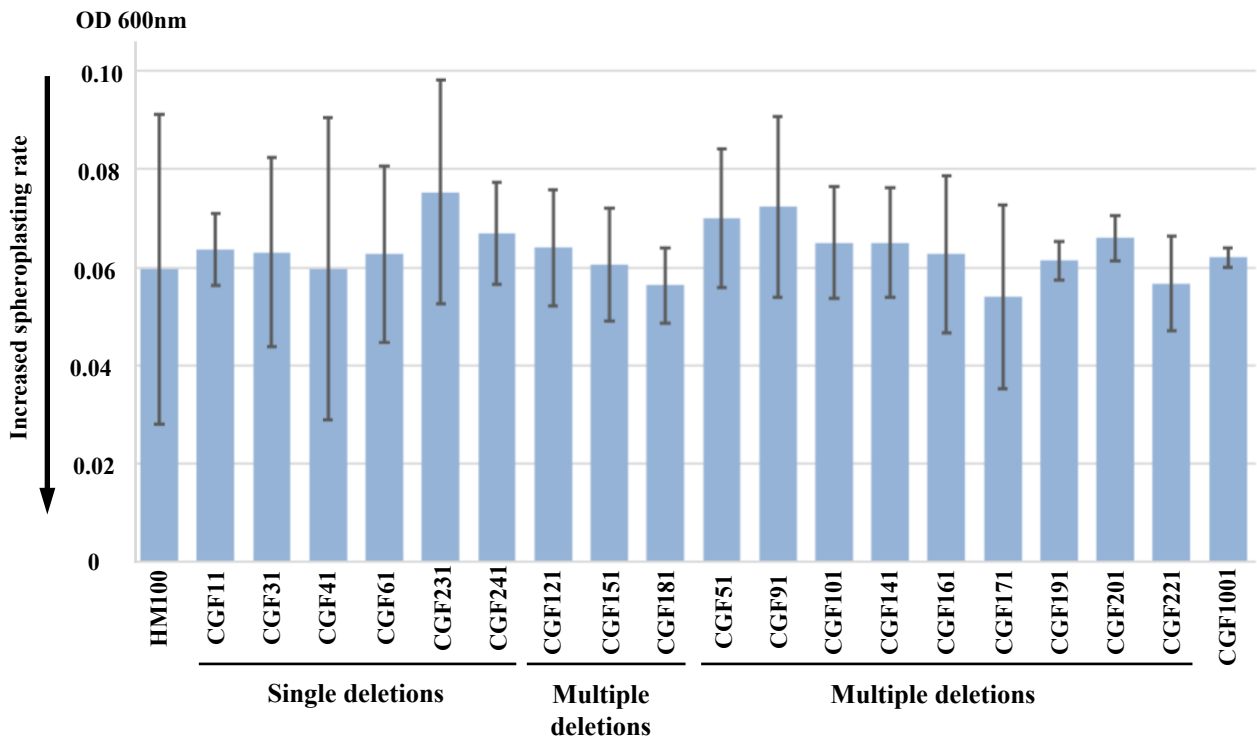

Figure 4  
Saguez et al.

A

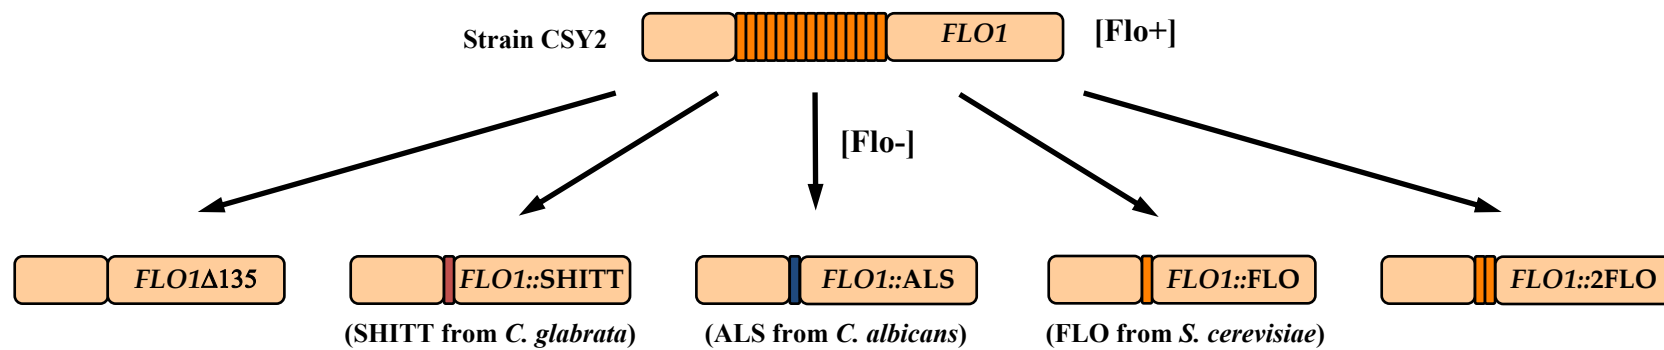

B

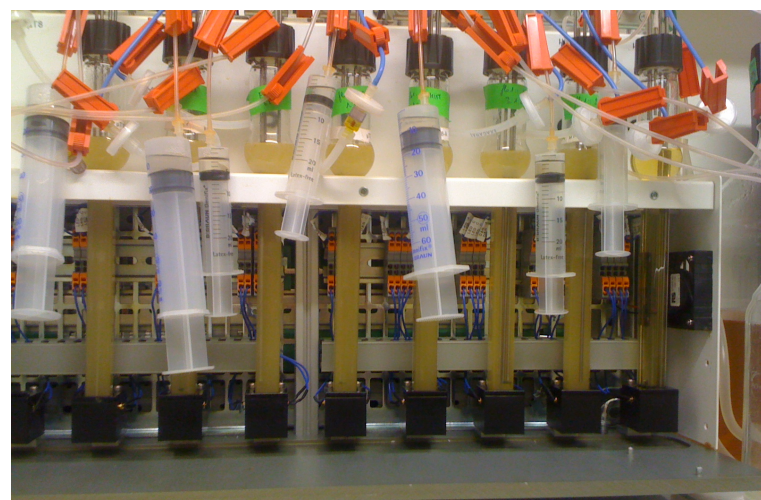

[Flo+]  
⇒

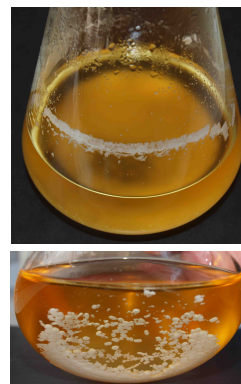

- Functional complementation with known flocculation mutants

- Whole-genome sequencing

- Adhesion test on agar plate

- Flocculation test

C

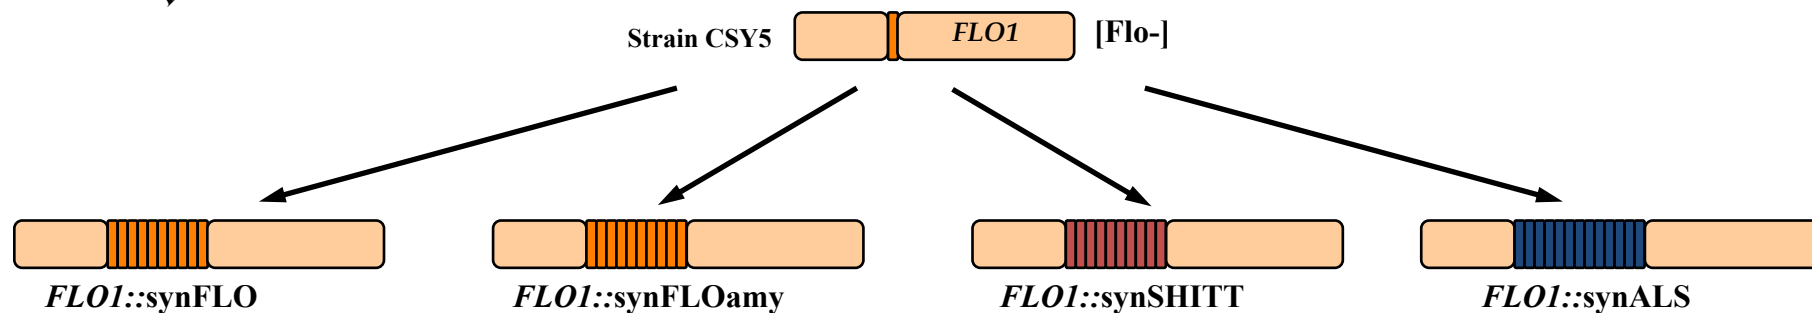

WT  
*FLO1*::FLO  
*FLO1*::SHITT  
*FLO1*::ALS  
*FLO1*::2FLO  
*FLO1*AR  
*flo1*Δ  
No cell

## A Flocculation assay

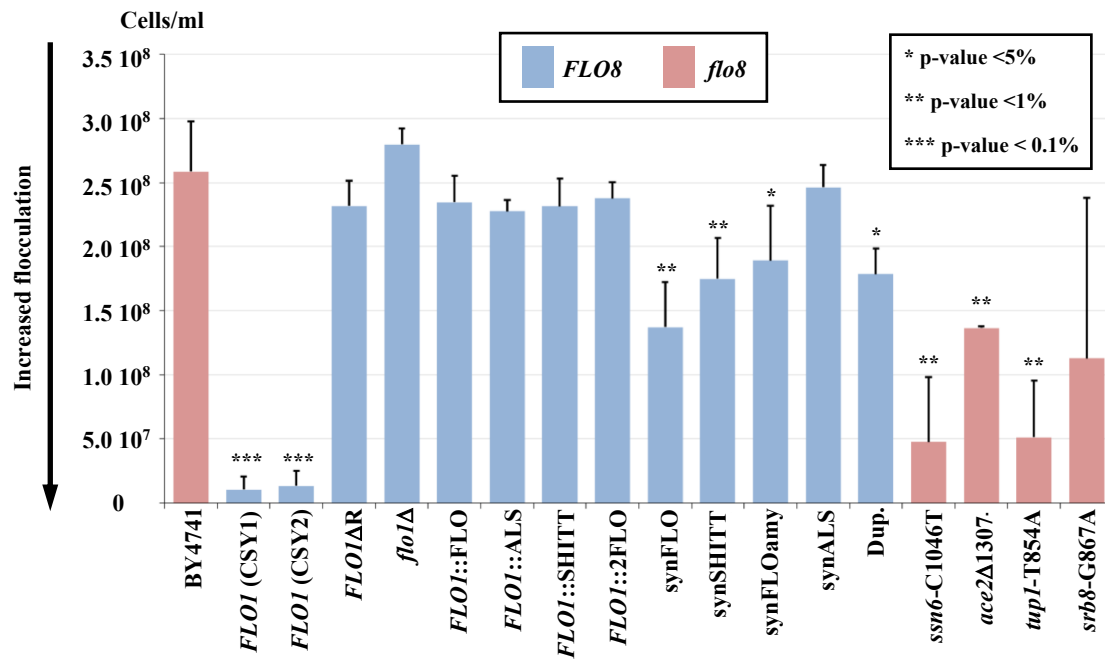

## B Adhesion assay

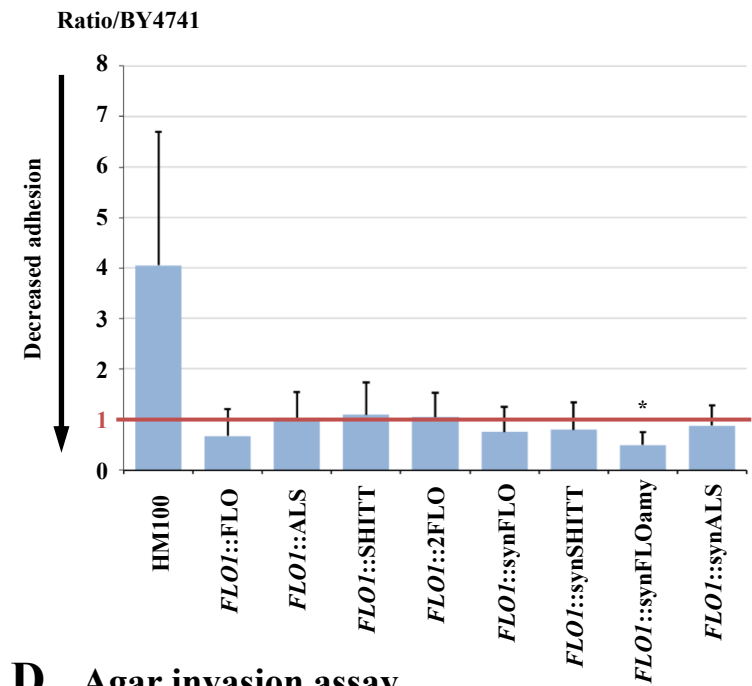

## C Cell wall integrity assay

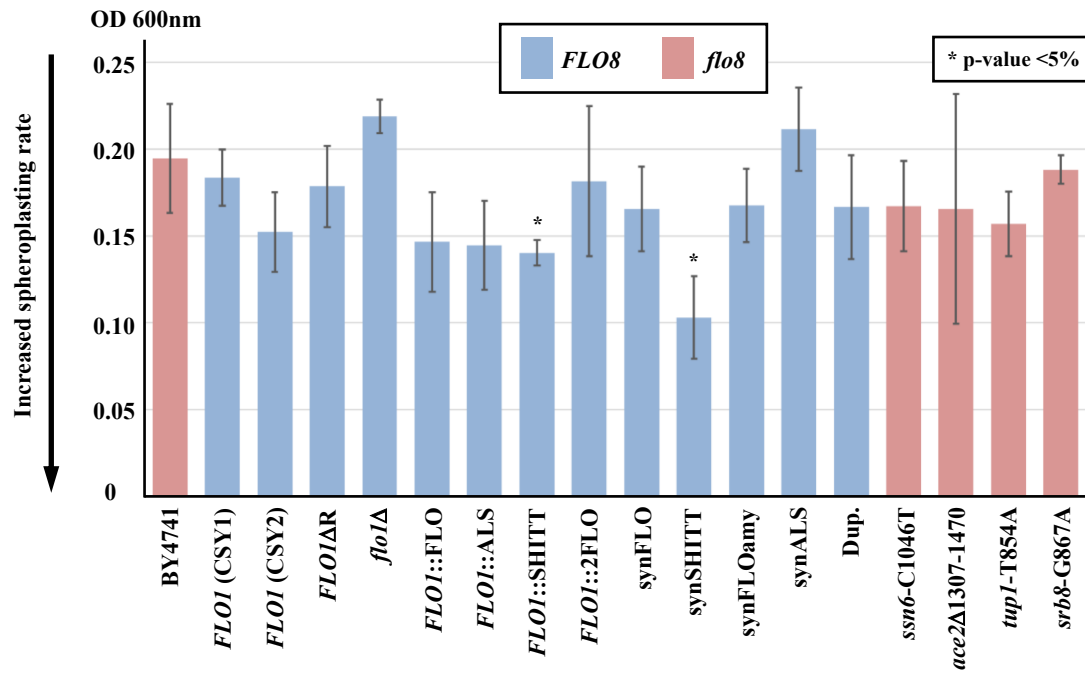

## D Agar invasion assay

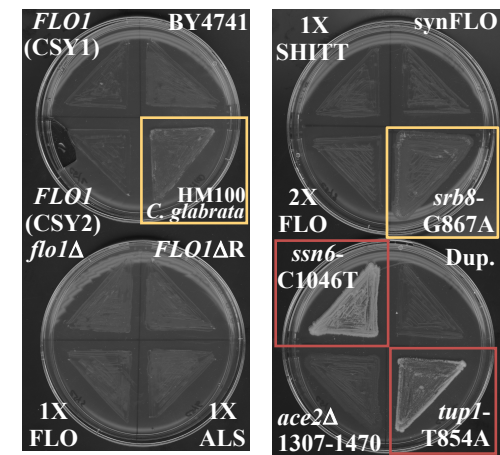

Source: http://biorxiv.org/content/10.1101/2022.01.14.476295v1.full.pdf
